# Supplementary material for: The simplest structure of a stable radical showing high fluorescence efficiency in solution: benzene donors with triarylmethyl radicals
Source: Royal Society of Chemistry journal article supplement (doi:10.1039/d2sc05079j), 2022-01-01
Supplement: d2sc05079j1.pdf [file d2sc05079j1.pdf]

## Supplementary Information

# **Simplest structure of stable radical showing high-efficiency fluorescence in solution: benzene donors with triarylmethyl radical**

Yohei Hattori <sup>a,\*</sup>, Ryota Kitajima <sup>a</sup>, Wataru Ota <sup>b</sup>, Ryota Matsuoka <sup>c,d</sup>, Tetsuro Kusamoto <sup>c,d,e</sup>,  
Tohru Sato <sup>f</sup>, and Kingo Uchida <sup>a</sup>

<sup>a</sup> Materials Chemistry Course, Faculty of Advanced Science and Technology, Ryukoku University, Seta, Otsu, Shiga 520-2194, Japan

<sup>b</sup> MOLFEX, Inc., Takano-Nishibiraki-cho 34-4, Sakyou-ku, Kyoto 606-8103, Japan

<sup>c</sup> Department of Life and Coordination-Complex Molecular Science, Institute for Molecular Science, 5-1, Higashiyama, Myodaiji, Okazaki, Aichi 444-8787, Japan

<sup>d</sup> SOKENDAI (The Graduate University for Advanced Studies), Shonan Village, Hayama, Kanagawa 240-0193, Japan

<sup>e</sup> JST-PRESTO, 4-1-8, Honcho, Kawaguchi, Saitama 332-0012, Japan

<sup>f</sup> Fukui Institute for Fundamental Chemistry, and Department of Molecular Engineering, Graduate School of Engineering, Kyoto University, Takano-Nishibiraki-cho 34-4, Sakyou-ku, Kyoto 606-8103, Japan

## Contents

|                                                                                                         |     |
|---------------------------------------------------------------------------------------------------------|-----|
| Table S1. Calculated torsion angles of the aryl rings of the radicals in dichloromethane                | S3  |
| Table S2. PLQYs and photophysical parameters of the radicals in chloroform                              | S3  |
| Table S3. Stability in dichloromethane under 370 nm UV irradiation.                                     | S3  |
| Fig. S1. EPR spectra                                                                                    | S4  |
| Fig. S2. Absolute photoluminescence quantum yield measurement of Mes <sub>2</sub> F <sub>2</sub> PyBTM. | S4  |
| Fig. S3. Stability in dichloromethane under 370 nm UV irradiation.                                      | S5  |
| Fig. S4. Photoluminescence decay curves                                                                 | S5  |
| Fig. S5. Calculated orbital levels at the D <sub>1</sub> optimized structure                            | S6  |
| Fig. S6. Calculated off-diagonal VCCs between D <sub>1</sub> and D <sub>0</sub> states                  | S6  |
| Fig. S7. Pictures of Mes <sub>2</sub> F <sub>2</sub> PyBTM in chloroform and rhodamine B in methanol    | S6  |
| Cartesian coordinates of all the optimized geometries by DFT calculation                                | S7  |
| NMR spectra                                                                                             | S13 |
| HRMS                                                                                                    | S16 |

**Table S1.** Calculated torsion angles of the aryl rings of the radicals in dichloromethane. Angles out of the brackets are in the D<sub>0</sub> state optimized using UB3LYP/6-31G(d, p). Angles in the brackets are in the D<sub>1</sub> state optimized using TD-UB3LYP/6-31G(d, p).

|             | PyBTM     | PyPBTM    | MesPyBTM  | Mes <sub>2</sub> PyBTM | F <sub>2</sub> PyBTM | Mes <sub>2</sub> F <sub>2</sub> PyBTM |
|-------------|-----------|-----------|-----------|------------------------|----------------------|---------------------------------------|
| $\varphi_1$ | 48° [35°] | 48° [43°] | 48° [37°] | 48° [37°]              | 32° [19°]            | 32° [24°]                             |
| $\varphi_2$ | 49° [51°] | 48° [45°] | 49° [52°] | 49° [51°]              | 53° [52°]            | 52° [53°]                             |
| $\varphi_3$ | 49° [47°] | 48° [45°] | 49° [47°] | 49° [48°]              | 53° [52°]            | 52° [49°]                             |
| $\phi_4$    | -         | 34° [25°] | 83° [51°] | 84° [50°]              | -                    | 87° [49°]                             |
| $\phi_5$    | -         | 34° [25°] |           | 84° [81°]              | -                    | 87° [83°]                             |

$\varphi_1$ : Torsion angle of pyridyl ring.  $\varphi_2$  and  $\varphi_3$ : Torsion angles of dichlorophenyl rings.  $\phi_4$  and  $\phi_5$ : Dihedral angles between mesityl (phenyl) groups and dichlorophenyl groups.

**Table S2.** PLQYs and photophysical parameters of radicals in chloroform.

|                                       | $\Phi_f$ / % | $\tau$ / ns | $k_f$ / 10 <sup>7</sup> s <sup>-1</sup> | $k_{nr}$ / 10 <sup>7</sup> s <sup>-1</sup> |
|---------------------------------------|--------------|-------------|-----------------------------------------|--------------------------------------------|
| PyBTM                                 | 3            | 7.6         | 0.4                                     | 12.8                                       |
| F <sub>2</sub> PyBTM                  | 6            | 18.1        | 0.3                                     | 5.2                                        |
| PyPBTM                                | 8.6          | 12          | 0.7                                     | 7.6                                        |
| MesPyBTM                              | 28           | 26          | 1.1                                     | 2.8                                        |
| Mes <sub>2</sub> PyBTM                | 45           | 39          | 1.2                                     | 1.4                                        |
| Mes <sub>2</sub> F <sub>2</sub> PyBTM | 69           | 49          | 1.4                                     | 0.6                                        |

**Table S3.** Stability of PyBTM, MesPyBTM, Mes<sub>2</sub>PyBTM, and Mes<sub>2</sub>F<sub>2</sub>PyBTM in dichloromethane under 370 nm UV irradiation.

| Exp. no. | $t_{1/2}$ [s]<br>PyBTM | $t_{1/2}$ [s]<br>MesPyBTM | $t_{1/2}$ [s]<br>Mes <sub>2</sub> PyBTM | $t_{1/2}$ [s]<br>Mes <sub>2</sub> F <sub>2</sub> PyBTM |
|----------|------------------------|---------------------------|-----------------------------------------|--------------------------------------------------------|
| 1        | 382                    | 240                       | 274                                     | 452                                                    |
| 2        | 312                    | 246                       | 276                                     | 424                                                    |
| 3        | 368                    | 260                       | 290                                     | 414                                                    |
| 4        | 360                    |                           |                                         |                                                        |
| 5        | 254                    |                           |                                         |                                                        |
| 6        | 276                    |                           |                                         |                                                        |
| 7        | 270                    |                           |                                         |                                                        |
| Ave.     | 317                    | 249                       | 280                                     | 430                                                    |
| $\sigma$ | 53                     | 10                        | 9                                       | 20                                                     |

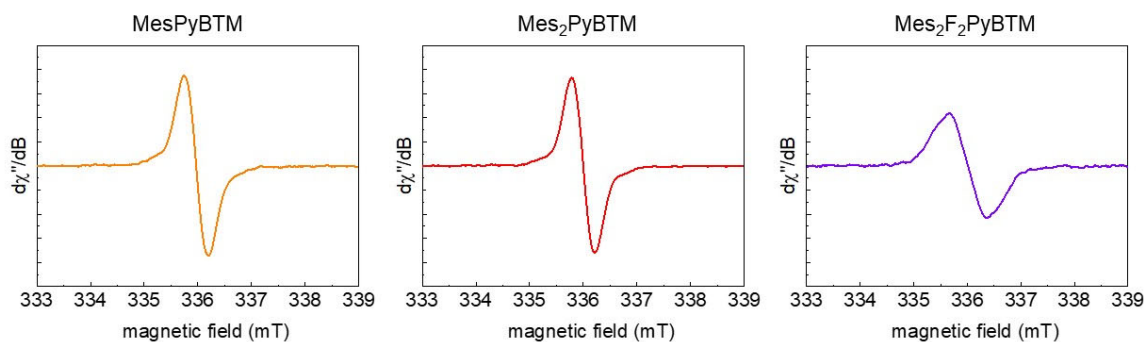

**Fig. S1.** EPR spectra of MesPyBTM, Mes<sub>2</sub>PyBTM, and Mes<sub>2</sub>F<sub>2</sub>PyBTM in dichloromethane. The *g* factors of the radicals were *ca.*  $g = 2.0032 \pm 0.0002$ .

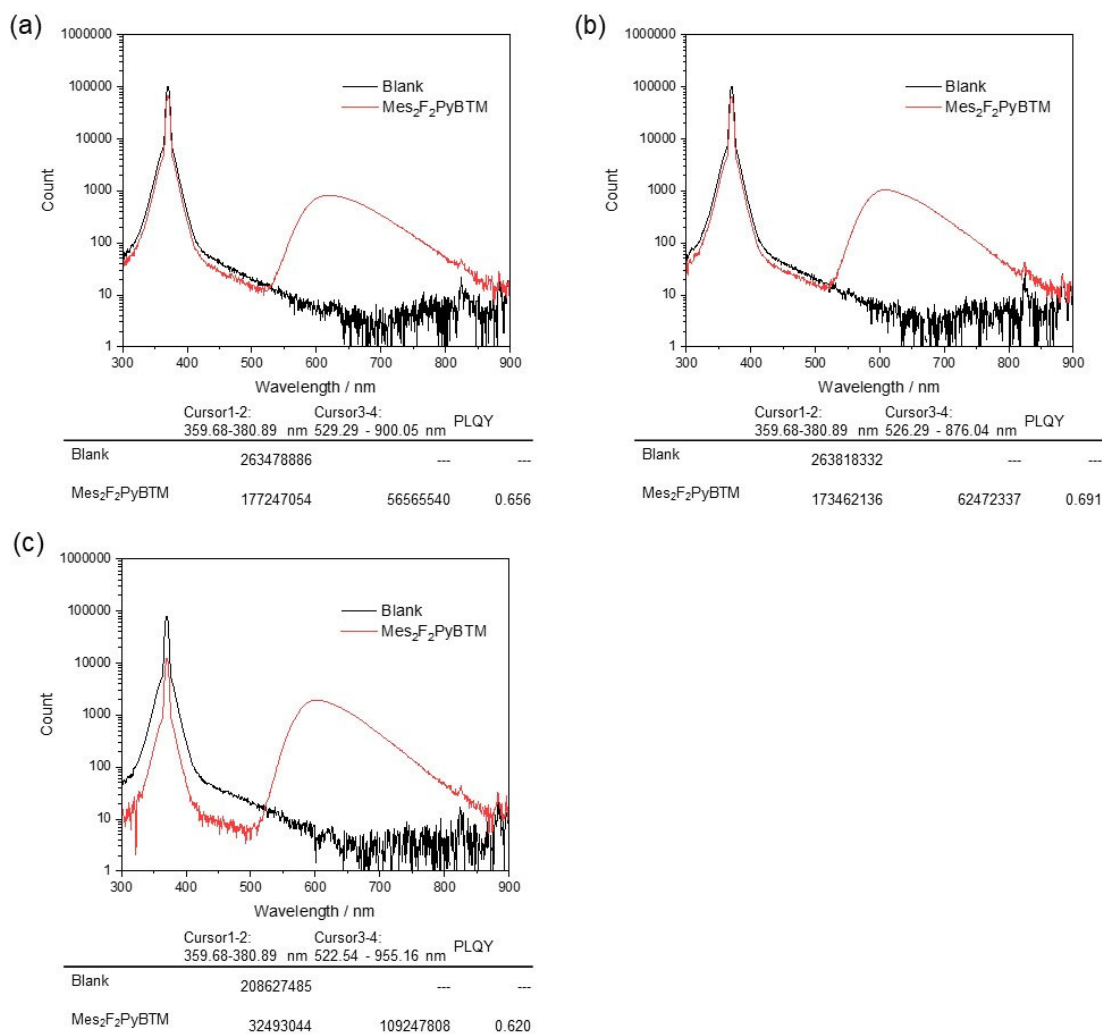

**Fig. S2.** Absolute photoluminescence quantum yield measurement of Mes<sub>2</sub>F<sub>2</sub>PyBTM in (a) dichloromethane, (b) chloroform and (c) PMMA film. The PLQYs were 66%, 69% and 62%, respectively.

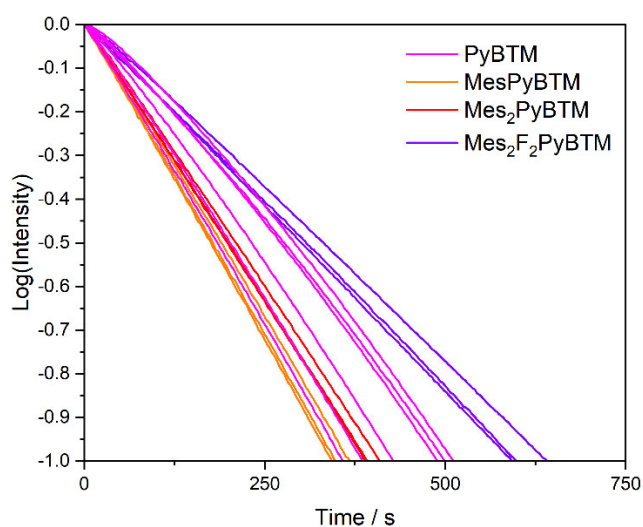

**Fig. S3.** Plots showing the emission decay of the radicals in dichloromethane under continuous excitation with light at  $\lambda_{\text{ex}} = 370 \text{ nm} \pm 10 \text{ nm}$ . The emission was monitored at the peak emission. The half-lives ( $t_{1/2}$ , Table S2) were directly determined from raw data. According to the linear approximation,  $\text{Log}(\text{Intensity}) \approx -0.3010 \times (\text{Time} / t_{1/2})$ .

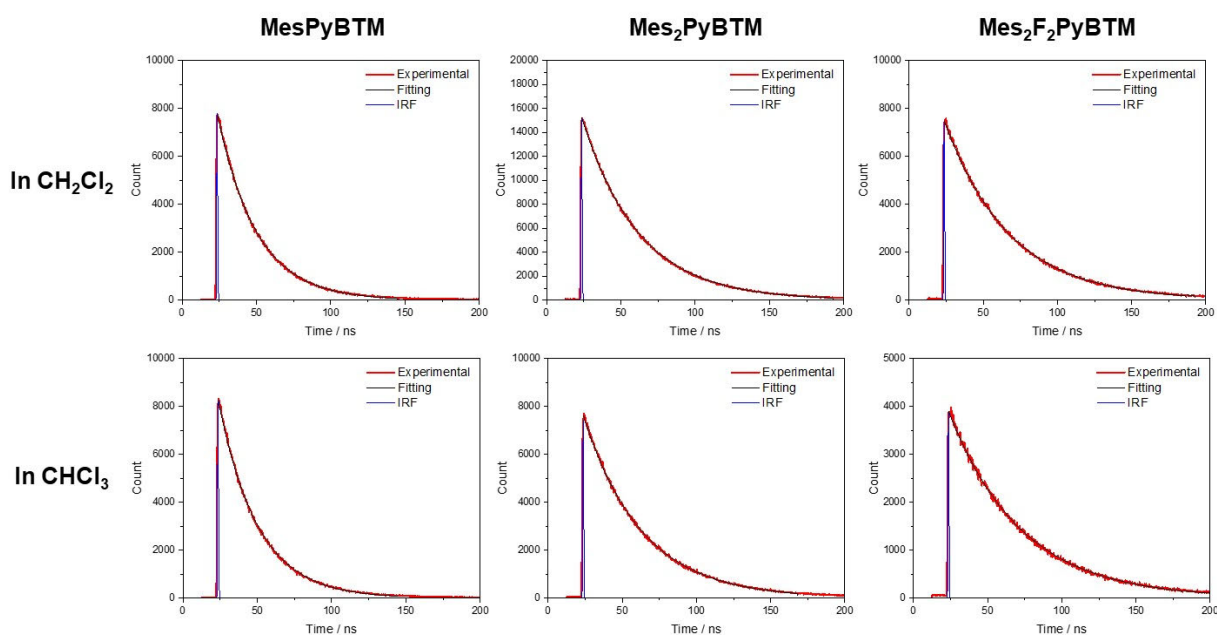

**Fig. S4.** Photoluminescence decay curves of the radicals excited with a picosecond diode laser with the emission wavelength of 375 nm.

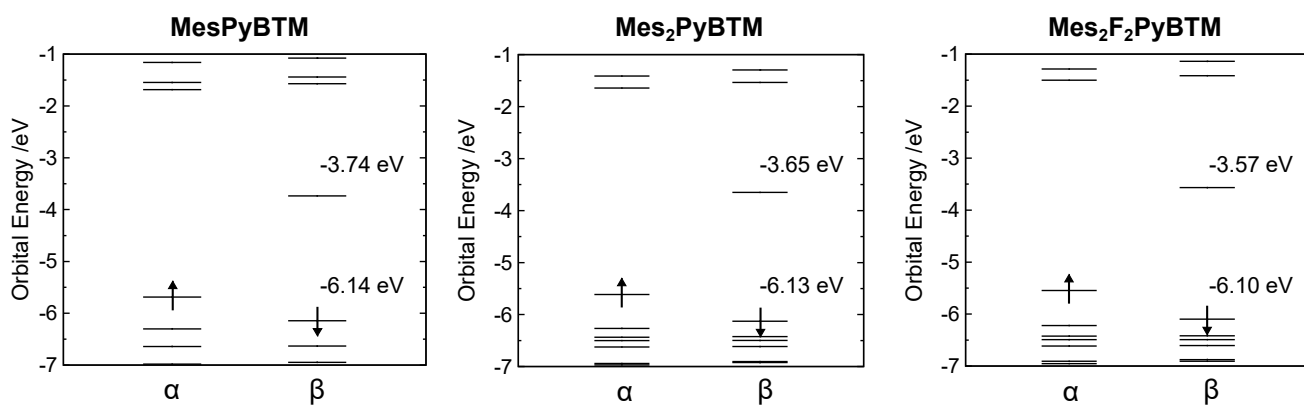

**Fig. S5.** Calculated orbital levels at the  $D_1$  optimized structure of MesPyBTM, Mes<sub>2</sub>PyBTM, and Mes<sub>2</sub>F<sub>2</sub>PyBTM. Orbital energy levels of the  $\beta$ -HOMO and -LUMO are written.

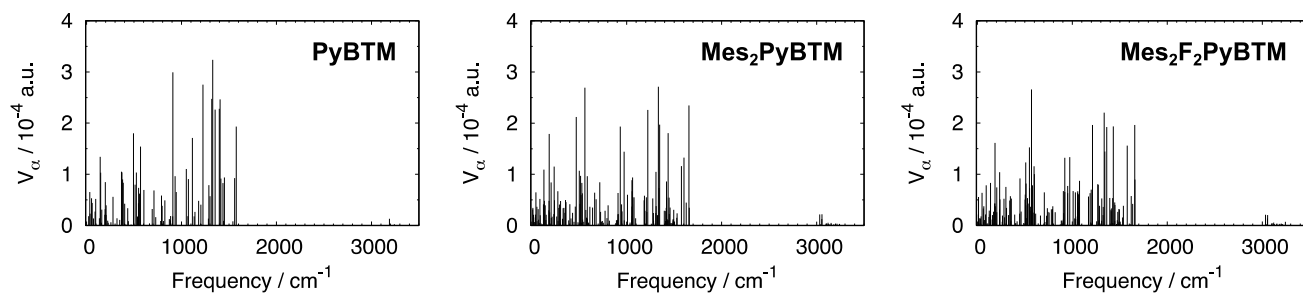

**Fig. S6.** Calculated off-diagonal vibronic coupling constants (VCCs) between  $D_1$  and  $D_0$  states of PyBTM, Mes<sub>2</sub>PyBTM, and Mes<sub>2</sub>F<sub>2</sub>PyBTM. Square sums of the off-diagonal VCCs,  $\sum_{\alpha} |V_{10,\alpha}|^2$ , are 8.45, 7.45, and  $6.84 \times 10^{-7}$  a.u. for PyBTM, Mes<sub>2</sub>PyBTM, and Mes<sub>2</sub>F<sub>2</sub>PyBTM, respectively.

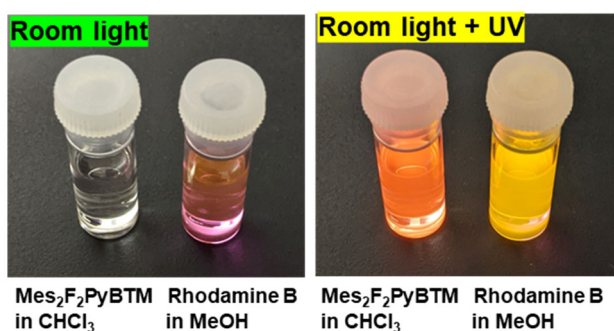

**Fig. S7.** Pictures of Mes<sub>2</sub>F<sub>2</sub>PyBTM in chloroform ( $A_{365 \text{ nm}} = 0.10$ ) and rhodamine B in methanol ( $A_{365 \text{ nm}} = 0.10$ ). Mes<sub>2</sub>F<sub>2</sub>PyBTM showed vivid fluorescence even under room light as well as rhodamine B when irradiated with 365 nm UV light.

## Cartesian coordinates of the optimized geometries by DFT calculation

MesPyBTM (D<sub>0</sub> state, UB3LYP/6-31G(d, p))

Standard orientation:

| Center<br>Number | Atomic<br>Number | Atomic<br>Type | Coordinates (Angstroms) |           |           |
|------------------|------------------|----------------|-------------------------|-----------|-----------|
|                  |                  |                | X                       | Y         | Z         |
| 1                | 17               | 0              | -0.360918               | 1.750976  | 2.340760  |
| 2                | 17               | 0              | 0.886480                | -1.963855 | 1.979582  |
| 3                | 17               | 0              | 0.108016                | -1.251533 | -2.288973 |
| 4                | 17               | 0              | 3.574799                | 0.596541  | -2.125164 |
| 5                | 7                | 0              | 2.934101                | 4.465129  | 0.431533  |
| 6                | 6                | 0              | -2.381480               | 0.639557  | 0.979374  |
| 7                | 1                | 0              | -2.983913               | 1.094652  | 1.756840  |
| 8                | 6                | 0              | -0.791465               | -0.539997 | -0.954203 |
| 9                | 6                | 0              | 3.319540                | -0.720003 | -0.992462 |
| 10               | 6                | 0              | 1.961429                | 4.190527  | -0.440601 |
| 11               | 1                | 0              | 1.595745                | 5.008377  | -1.054704 |
| 12               | 6                | 0              | 1.870498                | 1.819503  | 0.173118  |
| 13               | 6                | 0              | 4.192080                | -1.795845 | -1.113710 |
| 14               | 6                | 0              | 3.999802                | -2.908590 | -0.301629 |
| 15               | 6                | 0              | -1.004527               | 0.826113  | 0.988763  |
| 16               | 6                | 0              | 1.418928                | 2.916971  | -0.599858 |
| 17               | 6                | 0              | 2.105107                | -1.860087 | 0.720796  |
| 18               | 6                | 0              | 2.958731                | -2.953356 | 0.619653  |
| 19               | 6                | 0              | -2.166942               | -0.738470 | -0.974092 |
| 20               | 6                | 0              | 2.237481                | -0.692986 | -0.075185 |
| 21               | 6                | 0              | -0.137265               | 0.250537  | 0.025139  |
| 22               | 6                | 0              | 2.899606                | 2.157312  | 1.085479  |
| 23               | 6                | 0              | 3.391736                | 3.457579  | 1.178177  |
| 24               | 6                | 0              | 1.321882                | 0.457122  | 0.040830  |
| 25               | 1                | 0              | 4.176909                | 3.682807  | 1.894063  |
| 26               | 6                | 0              | -2.986770               | -0.149134 | -0.005346 |
| 27               | 1                | 0              | 4.991759                | -1.769968 | -1.842436 |
| 28               | 6                | 0              | -4.469250               | -0.356245 | -0.021157 |
| 29               | 6                | 0              | -5.022187               | -1.521451 | 0.550193  |
| 30               | 6                | 0              | -5.307588               | 0.612814  | -0.610983 |
| 31               | 6                | 0              | -6.410244               | -1.693841 | 0.523219  |
| 32               | 6                | 0              | -6.689762               | 0.396472  | -0.617521 |
| 33               | 6                | 0              | -7.262688               | -0.747023 | -0.052758 |
| 34               | 1                | 0              | -6.834665               | -2.592805 | 0.964363  |
| 35               | 1                | 0              | -7.333929               | 1.141511  | -1.078844 |
| 36               | 1                | 0              | -2.604408               | -1.339653 | -1.762577 |
| 37               | 1                | 0              | 2.822339                | -3.812454 | 1.263508  |
| 38               | 6                | 0              | -4.740296               | 1.865589  | -1.240524 |
| 39               | 1                | 0              | -4.232112               | 2.495867  | -0.502457 |
| 40               | 1                | 0              | -4.001869               | 1.630190  | -2.014498 |
| 41               | 1                | 0              | -5.532600               | 2.461554  | -1.699853 |
| 42               | 6                | 0              | -4.146377               | -2.576311 | 1.188836  |
| 43               | 1                | 0              | -3.470071               | -3.037705 | 0.460827  |
| 44               | 1                | 0              | -3.516603               | -2.153649 | 1.979058  |
| 45               | 1                | 0              | -4.754338               | -3.369893 | 1.629888  |
| 46               | 6                | 0              | -8.760569               | -0.941545 | -0.042158 |
| 47               | 1                | 0              | -9.026267               | -2.002476 | -0.063320 |
| 48               | 1                | 0              | -9.207545               | -0.512962 | 0.863504  |
| 49               | 1                | 0              | -9.233244               | -0.452756 | -0.899030 |
| 50               | 17               | 0              | 0.219762                | 2.733039  | -1.864827 |
| 51               | 17               | 0              | 3.557576                | 0.991714  | 2.217349  |
| 52               | 17               | 0              | 5.085441                | -4.274400 | -0.441280 |

Mes<sub>2</sub>PyBTM (D<sub>0</sub> state, UB3LYP/6-31G(d, p))

Standard orientation:

| Center<br>Number | Atomic<br>Number | Atomic<br>Type | Coordinates (Angstroms) |           |           |
|------------------|------------------|----------------|-------------------------|-----------|-----------|
|                  |                  |                | X                       | Y         | Z         |
| 1                | 17               | 0              | -2.102681               | 2.093696  | 2.185968  |
| 2                | 17               | 0              | 0.437495                | -0.913705 | 2.156131  |
| 3                | 17               | 0              | -0.437492               | -0.913707 | -2.156126 |
| 4                | 17               | 0              | 2.102681                | 2.093696  | -2.185965 |
| 5                | 7                | 0              | -0.000001               | 5.657858  | 0.000001  |
| 6                | 6                | 0              | -3.530066               | 0.192766  | 0.952839  |
| 7                | 1                | 0              | -4.277716               | 0.457974  | 1.691251  |
| 8                | 6                | 0              | -1.568535               | -0.474314 | -0.881231 |
| 9                | 6                | 0              | 2.321677                | 0.878779  | -0.930965 |
| 10               | 6                | 0              | -0.779256               | 4.963628  | -0.832530 |
| 11               | 1                | 0              | -1.406650               | 5.527929  | -1.516459 |
| 12               | 6                | 0              | 0.000000                | 2.793409  | 0.000001  |
| 13               | 6                | 0              | 3.530066                | 0.192765  | -0.952838 |
| 14               | 6                | 0              | 3.773987                | -0.848639 | -0.050750 |
| 15               | 6                | 0              | -2.321677               | 0.878779  | 0.930967  |
| 16               | 6                | 0              | -0.806452               | 3.571006  | -0.866711 |
| 17               | 6                | 0              | 1.568537                | -0.474313 | 0.881235  |
| 18               | 6                | 0              | 2.770404                | -1.172493 | 0.868813  |
| 19               | 6                | 0              | -2.770402               | -1.172493 | -0.868810 |
| 20               | 6                | 0              | 1.278737                | 0.585340  | -0.015804 |
| 21               | 6                | 0              | -1.278736               | 0.585340  | 0.015808  |
| 22               | 6                | 0              | 0.806452                | 3.571007  | 0.866714  |
| 23               | 6                | 0              | 0.779255                | 4.963629  | 0.832532  |
| 24               | 6                | 0              | 0.000000                | 1.318992  | 0.000002  |
| 25               | 1                | 0              | 1.406649                | 5.527931  | 1.516461  |
| 26               | 6                | 0              | -3.773987               | -0.848638 | 0.050751  |
| 27               | 1                | 0              | 4.277716                | 0.457972  | -1.691251 |
| 28               | 6                | 0              | 5.071618                | -1.595010 | -0.069533 |
| 29               | 6                | 0              | 5.167407                | -2.820425 | -0.761629 |
| 30               | 6                | 0              | 6.192742                | -1.072545 | 0.608592  |
| 31               | 6                | 0              | 6.389576                | -3.501254 | -0.764410 |
| 32               | 6                | 0              | 7.393837                | -1.789412 | 0.580878  |
| 33               | 6                | 0              | 7.515791                | -3.003137 | -0.102357 |
| 34               | 1                | 0              | 6.461158                | -4.446035 | -1.298414 |
| 35               | 1                | 0              | 8.255201                | -1.388230 | 1.110045  |
| 36               | 6                | 0              | -5.071619               | -1.595007 | 0.069531  |
| 37               | 6                | 0              | -5.167419               | -2.820406 | 0.761653  |
| 38               | 6                | 0              | -6.192732               | -1.072556 | -0.608621 |
| 39               | 6                | 0              | -6.389589               | -3.501234 | 0.764430  |
| 40               | 6                | 0              | -7.393828               | -1.789421 | -0.580911 |
| 41               | 6                | 0              | -7.515793               | -3.003130 | 0.102348  |
| 42               | 1                | 0              | -6.461179               | -4.446004 | 1.298453  |
| 43               | 1                | 0              | -8.255183               | -1.388248 | -1.110098 |
| 44               | 1                | 0              | -2.933176               | -1.960802 | -1.594520 |
| 45               | 1                | 0              | 2.933178                | -1.960802 | 1.594523  |
| 46               | 6                | 0              | -6.114600               | 0.233704  | -1.366980 |
| 47               | 1                | 0              | -5.894723               | 1.075960  | -0.701796 |
| 48               | 1                | 0              | -5.322151               | 0.215282  | -2.122893 |
| 49               | 1                | 0              | -7.059486               | 0.445321  | -1.873290 |
| 50               | 6                | 0              | -3.981103               | -3.402999 | 1.497023  |
| 51               | 1                | 0              | -3.156513               | -3.638309 | 0.815246  |
| 52               | 1                | 0              | -3.584004               | -2.703303 | 2.240319  |
| 53               | 1                | 0              | -4.260037               | -4.323652 | 2.015244  |
| 54               | 6                | 0              | -8.832707               | -3.741750 | 0.145458  |
| 55               | 1                | 0              | -8.682896               | -4.821320 | 0.238753  |
| 56               | 1                | 0              | -9.436339               | -3.422330 | 1.004122  |
| 57               | 1                | 0              | -9.425606               | -3.554685 | -0.754582 |
| 58               | 6                | 0              | 6.114623                | 0.233730  | 1.366925  |
| 59               | 1                | 0              | 5.894750                | 1.075975  | 0.701724  |
| 60               | 1                | 0              | 5.322177                | 0.215329  | 2.122841  |
| 61               | 1                | 0              | 7.059513                | 0.445350  | 1.873226  |
| 62               | 6                | 0              | 3.981080                | -3.403032 | -1.496970 |
| 63               | 1                | 0              | 3.156504                | -3.638339 | -0.815175 |
| 64               | 1                | 0              | 3.583964                | -2.703347 | -2.240267 |
| 65               | 1                | 0              | 4.260009                | -4.323691 | -2.015185 |
| 66               | 6                | 0              | 8.832703                | -3.741758 | -0.145470 |
| 67               | 1                | 0              | 8.682890                | -4.821331 | -0.238739 |
| 68               | 1                | 0              | 9.436323                | -3.422357 | -1.004150 |
| 69               | 1                | 0              | 9.425616                | -3.554675 | 0.754557  |
| 70               | 17               | 0              | -1.820044               | 2.842185  | -2.097566 |
| 71               | 17               | 0              | 1.820045                | 2.842187  | 2.097568  |



Mes<sub>2</sub>F<sub>2</sub>PyBTM (D<sub>0</sub> state, UB3LYP/6-31G(d, p))

Standard orientation:

| Center<br>Number | Atomic<br>Number | Atomic<br>Type | Coordinates (Angstroms) |           |           |
|------------------|------------------|----------------|-------------------------|-----------|-----------|
|                  |                  |                | X                       | Y         | Z         |
| 1                | 17               | 0              | -2.075743               | 2.128842  | 2.240584  |
| 2                | 17               | 0              | 0.460843                | -0.665325 | 2.252825  |
| 3                | 17               | 0              | -0.460843               | -0.665325 | -2.252824 |
| 4                | 17               | 0              | 2.075743                | 2.128842  | -2.240584 |
| 5                | 7                | 0              | 0.000000                | 5.772410  | 0.000000  |
| 6                | 6                | 0              | -3.515810               | 0.273944  | 0.947150  |
| 7                | 1                | 0              | -4.253733               | 0.500836  | 1.707813  |
| 8                | 6                | 0              | -1.583277               | -0.291565 | -0.949113 |
| 9                | 6                | 0              | 2.309794                | 0.963797  | -0.940168 |
| 10               | 6                | 0              | -0.967503               | 5.077488  | -0.611541 |
| 11               | 1                | 0              | -1.754775               | 5.628039  | -1.118846 |
| 12               | 6                | 0              | 0.000000                | 2.906772  | 0.000000  |
| 13               | 6                | 0              | 3.515810                | 0.273943  | -0.947151 |
| 14               | 6                | 0              | 3.772266                | -0.720115 | 0.004412  |
| 15               | 6                | 0              | -2.309794               | 0.963798  | 0.940168  |
| 16               | 6                | 0              | -0.994178               | 3.690804  | -0.625494 |
| 17               | 6                | 0              | 1.583277                | -0.291565 | 0.949113  |
| 18               | 6                | 0              | 2.784681                | -0.993302 | 0.955769  |
| 19               | 6                | 0              | -2.784681               | -0.993302 | -0.955769 |
| 20               | 6                | 0              | 1.281365                | 0.716245  | 0.002875  |
| 21               | 6                | 0              | -1.281365               | 0.716245  | -0.002875 |
| 22               | 6                | 0              | 0.994178                | 3.690804  | 0.625494  |
| 23               | 6                | 0              | 0.967503                | 5.077488  | 0.611540  |
| 24               | 6                | 0              | 0.000000                | 1.453923  | 0.000000  |
| 25               | 1                | 0              | 1.754775                | 5.628039  | 1.118845  |
| 26               | 6                | 0              | -3.772266               | -0.720116 | -0.004412 |
| 27               | 1                | 0              | 4.253733                | 0.500836  | -1.707813 |
| 28               | 6                | 0              | 5.069094                | -1.468773 | 0.003142  |
| 29               | 6                | 0              | 5.169844                | -2.698655 | -0.679910 |
| 30               | 6                | 0              | 6.184217                | -0.943220 | 0.688460  |
| 31               | 6                | 0              | 6.390930                | -3.381386 | -0.666143 |
| 32               | 6                | 0              | 7.384900                | -1.661246 | 0.676424  |
| 33               | 6                | 0              | 7.511586                | -2.879895 | 0.002806  |
| 34               | 1                | 0              | 6.466010                | -4.330487 | -1.191964 |
| 35               | 1                | 0              | 8.242137                | -1.256888 | 1.209886  |
| 36               | 6                | 0              | -5.069094               | -1.468773 | -0.003142 |
| 37               | 6                | 0              | -5.169844               | -2.698656 | 0.679909  |
| 38               | 6                | 0              | -6.184218               | -0.943220 | -0.688459 |
| 39               | 6                | 0              | -6.390930               | -3.381386 | 0.666142  |
| 40               | 6                | 0              | -7.384901               | -1.661246 | -0.676423 |
| 41               | 6                | 0              | -7.511586               | -2.879895 | -0.002805 |
| 42               | 1                | 0              | -6.466009               | -4.330488 | 1.191963  |
| 43               | 1                | 0              | -8.242137               | -1.256887 | -1.209884 |
| 44               | 1                | 0              | -2.956634               | -1.744439 | -1.717896 |
| 45               | 1                | 0              | 2.956634                | -1.744439 | 1.717896  |
| 46               | 6                | 0              | -6.099928               | 0.369144  | -1.435443 |
| 47               | 1                | 0              | -5.858326               | 1.201427  | -0.765300 |
| 48               | 1                | 0              | -5.318986               | 0.347650  | -2.203289 |
| 49               | 1                | 0              | -7.049012               | 0.598225  | -1.926054 |
| 50               | 6                | 0              | -3.988395               | -3.285151 | 1.419847  |
| 51               | 1                | 0              | -3.150085               | -3.491646 | 0.745541  |
| 52               | 1                | 0              | -3.612243               | -2.599997 | 2.187302  |
| 53               | 1                | 0              | -4.263577               | -4.222150 | 1.910029  |
| 54               | 6                | 0              | -8.827968               | -3.620342 | 0.022970  |
| 55               | 1                | 0              | -8.677702               | -4.700288 | 0.111105  |
| 56               | 1                | 0              | -9.440409               | -3.306953 | 0.877615  |
| 57               | 1                | 0              | -9.412325               | -3.428529 | -0.881658 |
| 58               | 6                | 0              | 6.099928                | 0.369144  | 1.435445  |
| 59               | 1                | 0              | 5.858325                | 1.201426  | 0.765303  |
| 60               | 1                | 0              | 5.318986                | 0.347648  | 2.203291  |
| 61               | 1                | 0              | 7.049011                | 0.598224  | 1.926056  |
| 62               | 6                | 0              | 3.988395                | -3.285150 | -1.419849 |
| 63               | 1                | 0              | 3.150086                | -3.491645 | -0.745544 |
| 64               | 1                | 0              | 3.612245                | -2.599996 | -2.187303 |
| 65               | 1                | 0              | 4.263578                | -4.222148 | -1.910031 |
| 66               | 6                | 0              | 8.827968                | -3.620342 | -0.022969 |
| 67               | 1                | 0              | 8.677702                | -4.700288 | -0.111104 |
| 68               | 1                | 0              | 9.440409                | -3.306953 | -0.877616 |
| 69               | 1                | 0              | 9.412326                | -3.428528 | 0.881658  |
| 70               | 9                | 0              | 1.996381                | 3.083697  | 1.286233  |
| 71               | 9                | 0              | -1.996381               | 3.083697  | -1.286233 |

MesPyBTM (D<sub>1</sub> state, UB3LYP/6-31G(d, p))

Standard orientation:

| Center<br>Number | Atomic<br>Number | Atomic<br>Type | Coordinates (Angstroms) |           |           |
|------------------|------------------|----------------|-------------------------|-----------|-----------|
|                  |                  |                | X                       | Y         | Z         |
| 1                | 17               | 0              | -0.350352               | -1.977429 | -2.176034 |
| 2                | 17               | 0              | 0.682889                | 1.766051  | -2.059587 |
| 3                | 17               | 0              | 0.133918                | 1.288091  | 2.260130  |
| 4                | 17               | 0              | 3.748714                | -0.358443 | 2.033267  |
| 5                | 7                | 0              | 3.029741                | -4.519749 | -0.071331 |
| 6                | 6                | 0              | -2.363473               | -0.792046 | -0.883134 |
| 7                | 1                | 0              | -2.961583               | -1.296251 | -1.630635 |
| 8                | 6                | 0              | -0.770477               | 0.533628  | 0.958041  |
| 9                | 6                | 0              | 3.331363                | 0.868767  | 0.839993  |
| 10               | 6                | 0              | 1.930012                | -4.215448 | 0.629870  |
| 11               | 1                | 0              | 1.467174                | -5.017983 | 1.198561  |
| 12               | 6                | 0              | 1.923825                | -1.819519 | -0.019454 |
| 13               | 6                | 0              | 4.132560                | 2.005290  | 0.857162  |
| 14               | 6                | 0              | 3.816099                | 3.065613  | 0.014800  |
| 15               | 6                | 0              | -0.992561               | -0.955277 | -0.902845 |
| 16               | 6                | 0              | 1.385090                | -2.941730 | 0.688596  |
| 17               | 6                | 0              | 1.967283                | 1.821905  | -0.851694 |
| 18               | 6                | 0              | 2.724758                | 2.987925  | -0.842611 |
| 19               | 6                | 0              | -2.128036               | 0.787288  | 0.929941  |
| 20               | 6                | 0              | 2.205245                | 0.694438  | -0.016802 |
| 21               | 6                | 0              | -0.099760               | -0.319991 | 0.024030  |
| 22               | 6                | 0              | 3.089103                | -2.211067 | -0.757031 |
| 23               | 6                | 0              | 3.587511                | -3.505006 | -0.747596 |
| 24               | 6                | 0              | 1.359453                | -0.499585 | -0.006502 |
| 25               | 1                | 0              | 4.470267                | -3.734100 | -1.339114 |
| 26               | 6                | 0              | -2.969848               | 0.111476  | 0.017286  |
| 27               | 1                | 0              | 4.969080                | 2.070925  | 1.541063  |
| 28               | 6                | 0              | -4.414719               | 0.335732  | 0.012624  |
| 29               | 6                | 0              | -4.942709               | 1.680478  | -0.030768 |
| 30               | 6                | 0              | -5.327668               | -0.783560 | 0.052461  |
| 31               | 6                | 0              | -6.314155               | 1.858571  | -0.044002 |
| 32               | 6                | 0              | -6.688381               | -0.534235 | 0.062516  |
| 33               | 6                | 0              | -7.214359               | 0.773431  | 0.006286  |
| 34               | 1                | 0              | -6.714733               | 2.865084  | -0.114985 |
| 35               | 1                | 0              | -7.376812               | -1.370237 | 0.136828  |
| 36               | 1                | 0              | -2.554932               | 1.440945  | 1.679334  |
| 37               | 1                | 0              | 2.485317                | 3.801435  | -1.515355 |
| 38               | 6                | 0              | -4.855744               | -2.212163 | 0.172484  |
| 39               | 1                | 0              | -4.578433               | -2.629910 | -0.801546 |
| 40               | 1                | 0              | -3.985795               | -2.304601 | 0.825448  |
| 41               | 1                | 0              | -5.657344               | -2.836735 | 0.572014  |
| 42               | 6                | 0              | -4.055970               | 2.896143  | -0.148782 |
| 43               | 1                | 0              | -3.655605               | 3.202719  | 0.823658  |
| 44               | 1                | 0              | -3.204956               | 2.720450  | -0.809795 |
| 45               | 1                | 0              | -4.629756               | 3.739107  | -0.539156 |
| 46               | 6                | 0              | -8.692209               | 1.004354  | -0.030460 |
| 47               | 1                | 0              | -8.961620               | 1.960962  | 0.423890  |
| 48               | 1                | 0              | -9.034892               | 1.034058  | -1.074192 |
| 49               | 1                | 0              | -9.238549               | 0.199020  | 0.466037  |
| 50               | 17               | 0              | 0.019811                | -2.739526 | 1.791888  |
| 51               | 17               | 0              | 3.914249                | -1.087378 | -1.841121 |
| 52               | 17               | 0              | 4.804983                | 4.519274  | 0.035623  |

Standard orientation:

| Center<br>Number | Atomic<br>Number | Atomic<br>Type | Coordinates (Angstroms) |           |           |
|------------------|------------------|----------------|-------------------------|-----------|-----------|
|                  |                  |                | X                       | Y         | Z         |
| 1                | 17               | 0              | 2.156290                | 2.169138  | -2.101216 |
| 2                | 17               | 0              | -0.319551               | -0.833275 | -2.104119 |
| 3                | 17               | 0              | 0.400114                | -0.831741 | 2.200671  |
| 4                | 17               | 0              | -2.219540               | 2.167648  | 2.142861  |
| 5                | 7                | 0              | 0.119883                | 5.765098  | 0.171144  |
| 6                | 6                | 0              | 3.521458                | 0.214780  | -0.899409 |
| 7                | 1                | 0              | 4.270844                | 0.469574  | -1.637106 |
| 8                | 6                | 0              | 1.530463                | -0.444372 | 0.914652  |
| 9                | 6                | 0              | -2.352784               | 0.932155  | 0.887208  |
| 10               | 6                | 0              | 1.004221                | 5.007737  | 0.833307  |
| 11               | 1                | 0              | 1.757631                | 5.525596  | 1.421488  |
| 12               | 6                | 0              | 0.027803                | 2.848326  | 0.092238  |
| 13               | 6                | 0              | -3.546494               | 0.220412  | 0.872231  |
| 14               | 6                | 0              | -3.734677               | -0.848130 | -0.012225 |
| 15               | 6                | 0              | 2.334596                | 0.918219  | -0.883833 |
| 16               | 6                | 0              | 0.982201                | 3.621460  | 0.829513  |
| 17               | 6                | 0              | -1.514092               | -0.412779 | -0.869943 |
| 18               | 6                | 0              | -2.685622               | -1.160161 | -0.883547 |
| 19               | 6                | 0              | 2.668822                | -1.222014 | 0.846251  |
| 20               | 6                | 0              | -1.260094               | 0.672154  | 0.012333  |
| 21               | 6                | 0              | 1.260656                | 0.655795  | 0.035304  |
| 22               | 6                | 0              | -0.880624               | 3.713870  | -0.601827 |
| 23               | 6                | 0              | -0.807136               | 5.096547  | -0.530784 |
| 24               | 6                | 0              | 0.003515                | 1.414401  | 0.045813  |
| 25               | 1                | 0              | -1.522453               | 5.691706  | -1.092759 |
| 26               | 6                | 0              | 3.713833                | -0.899666 | -0.051684 |
| 27               | 1                | 0              | -4.325974               | 0.479833  | 1.579748  |
| 28               | 6                | 0              | -5.012342               | -1.628375 | -0.023541 |
| 29               | 6                | 0              | -5.090653               | -2.865692 | 0.650301  |
| 30               | 6                | 0              | -6.139178               | -1.128086 | -0.710450 |
| 31               | 6                | 0              | -6.295054               | -3.577831 | 0.627339  |
| 32               | 6                | 0              | -7.322597               | -1.874625 | -0.709892 |
| 33               | 6                | 0              | -7.424277               | -3.099882 | -0.044077 |
| 34               | 1                | 0              | -6.350746               | -4.530586 | 1.149338  |
| 35               | 1                | 0              | -8.186200               | -1.488352 | -1.246830 |
| 36               | 6                | 0              | 4.946642                | -1.683837 | -0.090634 |
| 37               | 6                | 0              | 4.891663                | -3.124005 | -0.188200 |
| 38               | 6                | 0              | 6.231766                | -1.028362 | -0.029092 |
| 39               | 6                | 0              | 6.077157                | -3.837569 | -0.228668 |
| 40               | 6                | 0              | 7.378237                | -1.803120 | -0.049099 |
| 41               | 6                | 0              | 7.335907                | -3.208697 | -0.156676 |
| 42               | 1                | 0              | 6.038769                | -4.916890 | -0.339311 |
| 43               | 1                | 0              | 8.344359                | -1.316046 | 0.041192  |
| 44               | 1                | 0              | 2.795623                | -2.027601 | 1.557597  |
| 45               | 1                | 0              | -2.794402               | -1.967350 | -1.599111 |
| 46               | 6                | 0              | 6.376594                | 0.464597  | 0.144082  |
| 47               | 1                | 0              | 6.301703                | 0.992082  | -0.813244 |
| 48               | 1                | 0              | 5.613020                | 0.879296  | 0.804858  |
| 49               | 1                | 0              | 7.358675                | 0.697329  | 0.561066  |
| 50               | 6                | 0              | 3.592753                | -3.879376 | -0.334063 |
| 51               | 1                | 0              | 3.110309                | -4.048537 | 0.634843  |
| 52               | 1                | 0              | 2.877272                | -3.348916 | -0.965417 |
| 53               | 1                | 0              | 3.780575                | -4.861395 | -0.773234 |
| 54               | 6                | 0              | 8.599793                | -4.008724 | -0.222631 |
| 55               | 1                | 0              | 8.446397                | -5.035562 | 0.116992  |
| 56               | 1                | 0              | 8.955366                | -4.056346 | -1.261164 |
| 57               | 1                | 0              | 9.396513                | -3.547293 | 0.366709  |
| 58               | 6                | 0              | -6.084287               | 0.188262  | -1.453406 |
| 59               | 1                | 0              | -5.911747               | 1.030200  | -0.774217 |
| 60               | 1                | 0              | -5.268577               | 0.204565  | -2.183954 |
| 61               | 1                | 0              | -7.020847               | 0.373395  | -1.985458 |
| 62               | 6                | 0              | -3.902122               | -3.428935 | 1.397439  |
| 63               | 1                | 0              | -3.072130               | -3.663258 | 0.721848  |
| 64               | 1                | 0              | -3.514662               | -2.716017 | 2.132901  |
| 65               | 1                | 0              | -4.174252               | -4.346912 | 1.924561  |
| 66               | 6                | 0              | -8.723298               | -3.871014 | -0.028950 |
| 67               | 1                | 0              | -8.549234               | -4.946306 | 0.072083  |
| 68               | 1                | 0              | -9.355882               | -3.563976 | 0.813353  |
| 69               | 1                | 0              | -9.299290               | -3.702190 | -0.943666 |
| 70               | 17               | 0              | 2.152357                | 2.829828  | 1.890990  |
| 71               | 17               | 0              | -2.096513               | 3.073902  | -1.711152 |

Mes<sub>2</sub>F<sub>2</sub>PyBTM (D<sub>1</sub> state, UB3LYP/6-31G(d, p))

Standard orientation:

| Center<br>Number | Atomic<br>Number | Atomic<br>Type | Coordinates (Angstroms) |           |           |
|------------------|------------------|----------------|-------------------------|-----------|-----------|
|                  |                  |                | X                       | Y         | Z         |
| 1                | 17               | 0              | 2.117987                | 2.192359  | -2.168490 |
| 2                | 17               | 0              | -0.367752               | -0.667442 | -2.166342 |
| 3                | 17               | 0              | 0.404823                | -0.726833 | 2.206075  |
| 4                | 17               | 0              | -2.169296               | 2.168638  | 2.233655  |
| 5                | 7                | 0              | 0.178830                | 5.837638  | 0.237639  |
| 6                | 6                | 0              | 3.523322                | 0.305186  | -0.909203 |
| 7                | 1                | 0              | 4.268070                | 0.552095  | -1.654187 |
| 8                | 6                | 0              | 1.538421                | -0.339706 | 0.920392  |
| 9                | 6                | 0              | -2.347315               | 1.009771  | 0.911963  |
| 10               | 6                | 0              | 1.185040                | 5.057997  | 0.668101  |
| 11               | 1                | 0              | 2.065822                | 5.541926  | 1.083987  |
| 12               | 6                | 0              | 0.049803                | 2.926677  | 0.115261  |
| 13               | 6                | 0              | -3.556262               | 0.325205  | 0.874785  |
| 14               | 6                | 0              | -3.776117               | -0.692078 | -0.061426 |
| 15               | 6                | 0              | 2.323317                | 0.984401  | -0.913923 |
| 16               | 6                | 0              | 1.143216                | 3.678399  | 0.628706  |
| 17               | 6                | 0              | -1.552786               | -0.263583 | -0.915380 |
| 18               | 6                | 0              | -2.741265               | -0.984935 | -0.954862 |
| 19               | 6                | 0              | 2.693369                | -1.096010 | 0.877091  |
| 20               | 6                | 0              | -1.271078               | 0.774475  | 0.011344  |
| 21               | 6                | 0              | 1.255783                | 0.734497  | 0.018748  |
| 22               | 6                | 0              | -0.976183               | 3.808195  | -0.328802 |
| 23               | 6                | 0              | -0.888791               | 5.184171  | -0.255530 |
| 24               | 6                | 0              | 0.004427                | 1.501993  | 0.045247  |
| 25               | 1                | 0              | -1.720469               | 5.776591  | -0.630197 |
| 26               | 6                | 0              | 3.737746                | -0.776268 | -0.025204 |
| 27               | 1                | 0              | -4.323428               | 0.565205  | 1.602414  |
| 28               | 6                | 0              | -5.072285               | -1.440995 | -0.101713 |
| 29               | 6                | 0              | -5.188224               | -2.688988 | 0.546138  |
| 30               | 6                | 0              | -6.178368               | -0.900212 | -0.791268 |
| 31               | 6                | 0              | -6.408743               | -3.371688 | 0.494560  |
| 32               | 6                | 0              | -7.379456               | -1.617563 | -0.819196 |
| 33               | 6                | 0              | -7.518150               | -2.853250 | -0.179888 |
| 34               | 1                | 0              | -6.493073               | -4.333631 | 0.995477  |
| 35               | 1                | 0              | -8.227386               | -1.199493 | -1.357326 |
| 36               | 6                | 0              | 4.991447                | -1.524891 | -0.021193 |
| 37               | 6                | 0              | 4.980994                | -2.969795 | -0.052389 |
| 38               | 6                | 0              | 6.257740                | -0.828394 | 0.019963  |
| 39               | 6                | 0              | 6.186893                | -3.646611 | -0.053951 |
| 40               | 6                | 0              | 7.427544                | -1.568402 | 0.041875  |
| 41               | 6                | 0              | 7.427687                | -2.976394 | -0.002259 |
| 42               | 1                | 0              | 6.182576                | -4.730545 | -0.117369 |
| 43               | 1                | 0              | 8.377704                | -1.048708 | 0.116726  |
| 44               | 1                | 0              | 2.833147                | -1.878367 | 1.611149  |
| 45               | 1                | 0              | -2.871616               | -1.756353 | -1.705400 |
| 46               | 6                | 0              | 6.358326                | 0.673609  | 0.130175  |
| 47               | 1                | 0              | 6.282765                | 1.156466  | -0.850385 |
| 48               | 1                | 0              | 5.573859                | 1.095078  | 0.761496  |
| 49               | 1                | 0              | 7.327795                | 0.951309  | 0.549037  |
| 50               | 6                | 0              | 3.707135                | -3.771659 | -0.171332 |
| 51               | 1                | 0              | 3.229679                | -3.921949 | 0.803202  |
| 52               | 1                | 0              | 2.975859                | -3.288806 | -0.822317 |
| 53               | 1                | 0              | 3.928048                | -4.762240 | -0.574349 |
| 54               | 6                | 0              | 8.710583                | -3.747271 | -0.023416 |
| 55               | 1                | 0              | 8.620073                | -4.688621 | 0.525514  |
| 56               | 1                | 0              | 8.970893                | -4.005375 | -1.059169 |
| 57               | 1                | 0              | 9.538740                | -3.166299 | 0.387835  |
| 58               | 6                | 0              | -6.082476               | 0.429660  | -1.505327 |
| 59               | 1                | 0              | -5.876300               | 1.249313  | -0.808521 |
| 60               | 1                | 0              | -5.270954               | 0.434161  | -2.240814 |
| 61               | 1                | 0              | -7.014955               | 0.658909  | -2.027273 |
| 62               | 6                | 0              | -4.021370               | -3.295546 | 1.293406  |
| 63               | 1                | 0              | -3.182748               | -3.516886 | 0.624184  |
| 64               | 1                | 0              | -3.637345               | -2.614777 | 2.060557  |
| 65               | 1                | 0              | -4.315359               | -4.227517 | 1.782903  |
| 66               | 6                | 0              | -8.835165               | -3.593329 | -0.195659 |
| 67               | 1                | 0              | -8.687534               | -4.674598 | -0.119025 |
| 68               | 1                | 0              | -9.468822               | -3.291706 | 0.647798  |
| 69               | 1                | 0              | -9.397782               | -3.389064 | -1.111470 |
| 70               | 9                | 0              | -2.096987               | 3.281303  | -0.884422 |
| 71               | 9                | 0              | 2.213701                | 3.000492  | 1.127063  |

$^1\text{H}$  NMR (400 MHz,  $\text{CDCl}_3$ ) spectrum of  $\alpha\text{H-MesPyBTM}$

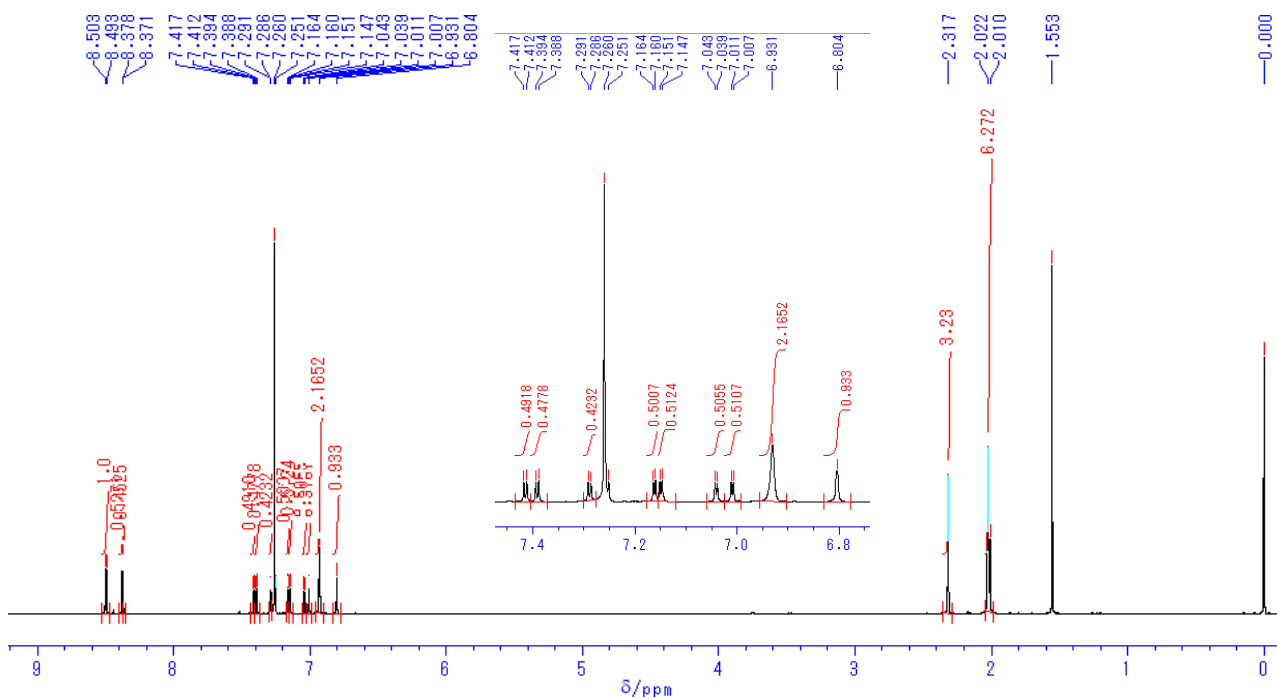

$^{13}\text{C}$  NMR (100 MHz,  $\text{CDCl}_3$ ) spectrum of  $\alpha\text{H-MesPyBTM}$

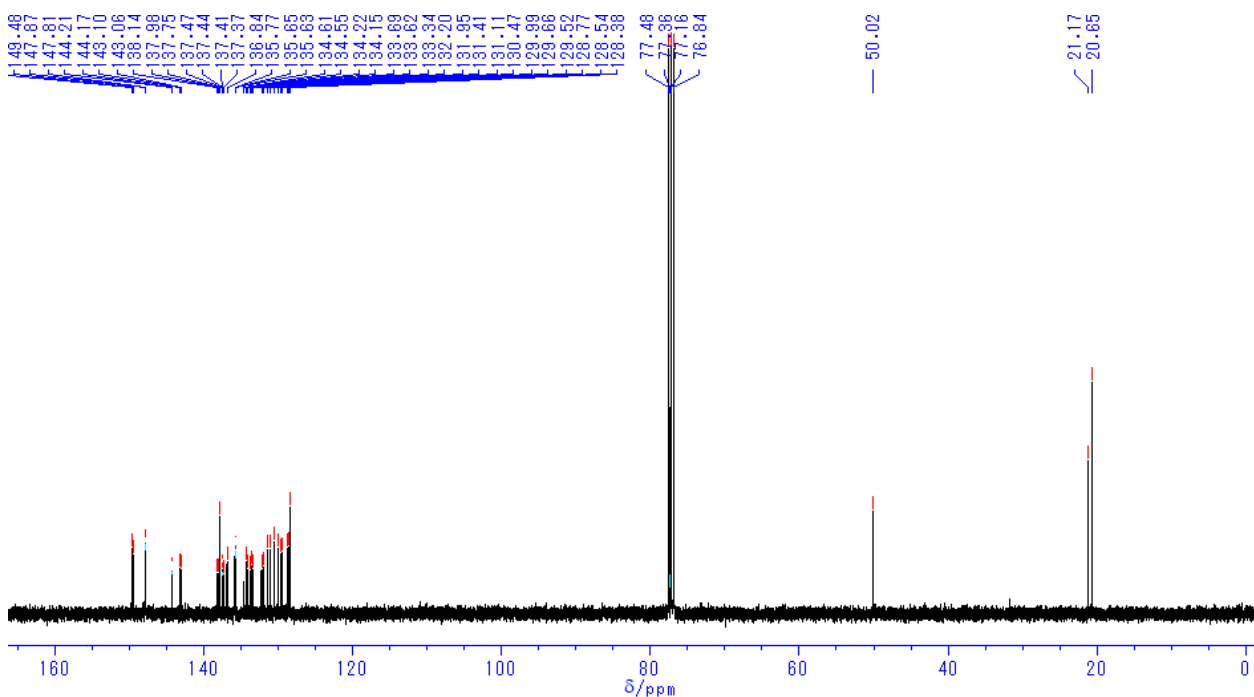

$^1\text{H}$  NMR (400 MHz,  $\text{CDCl}_3$ ) spectrum of  $\alpha\text{H-Mes}_2\text{PyBTM}$

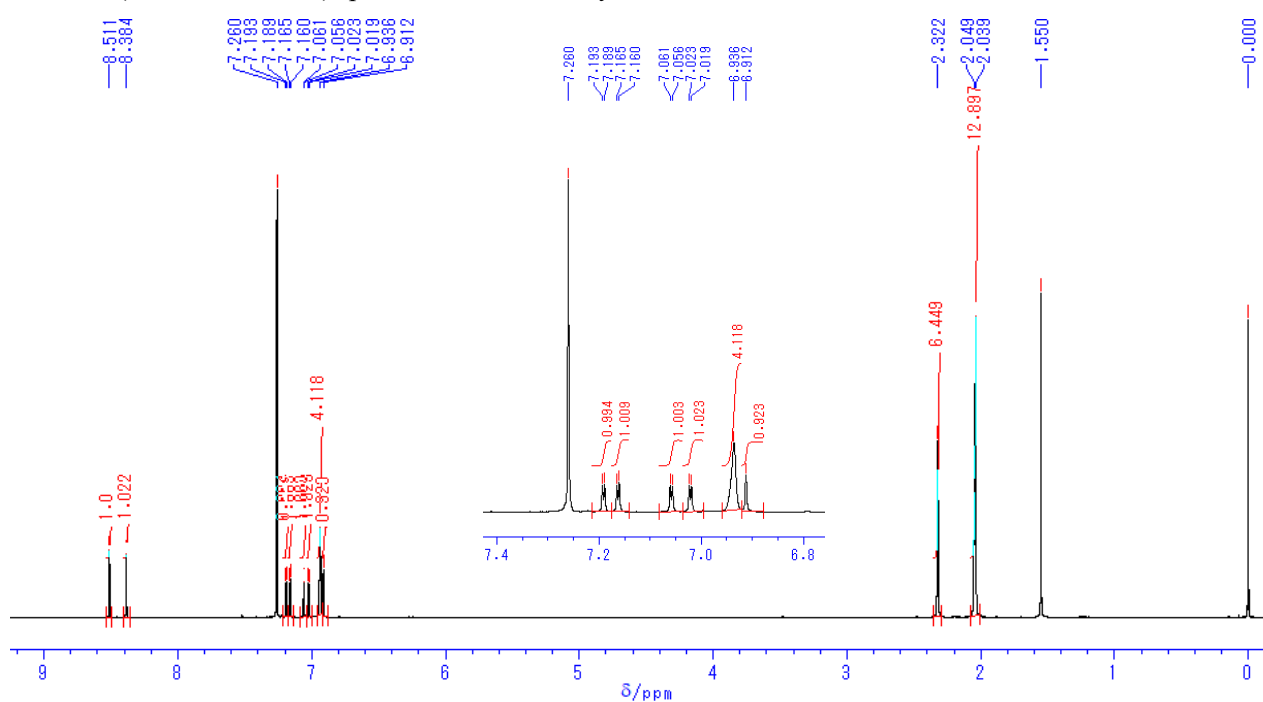

$^{13}\text{C}$  NMR (100 MHz,  $\text{CDCl}_3$ ) spectrum of  $\alpha\text{H-Mes}_2\text{PyBTM}$

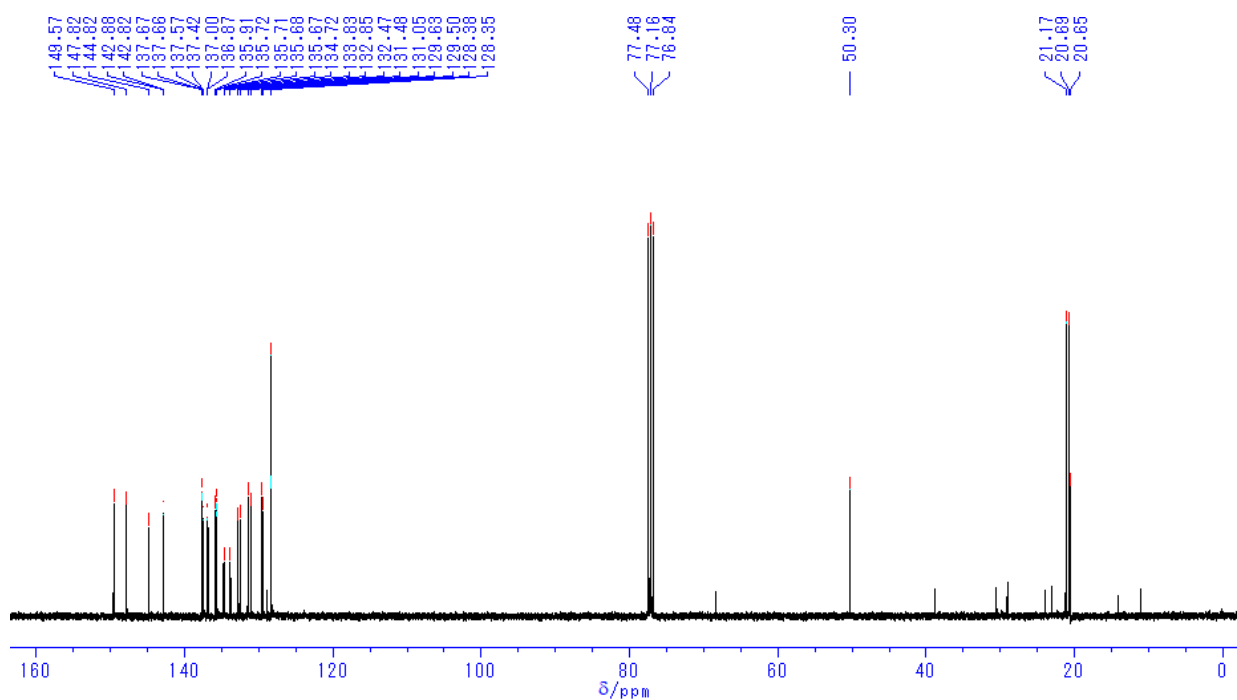

$^1\text{H}$  NMR (400 MHz,  $\text{CDCl}_3$ ) spectrum of  $\alpha\text{H-Mes}_2\text{F}_2\text{PyBTM}$

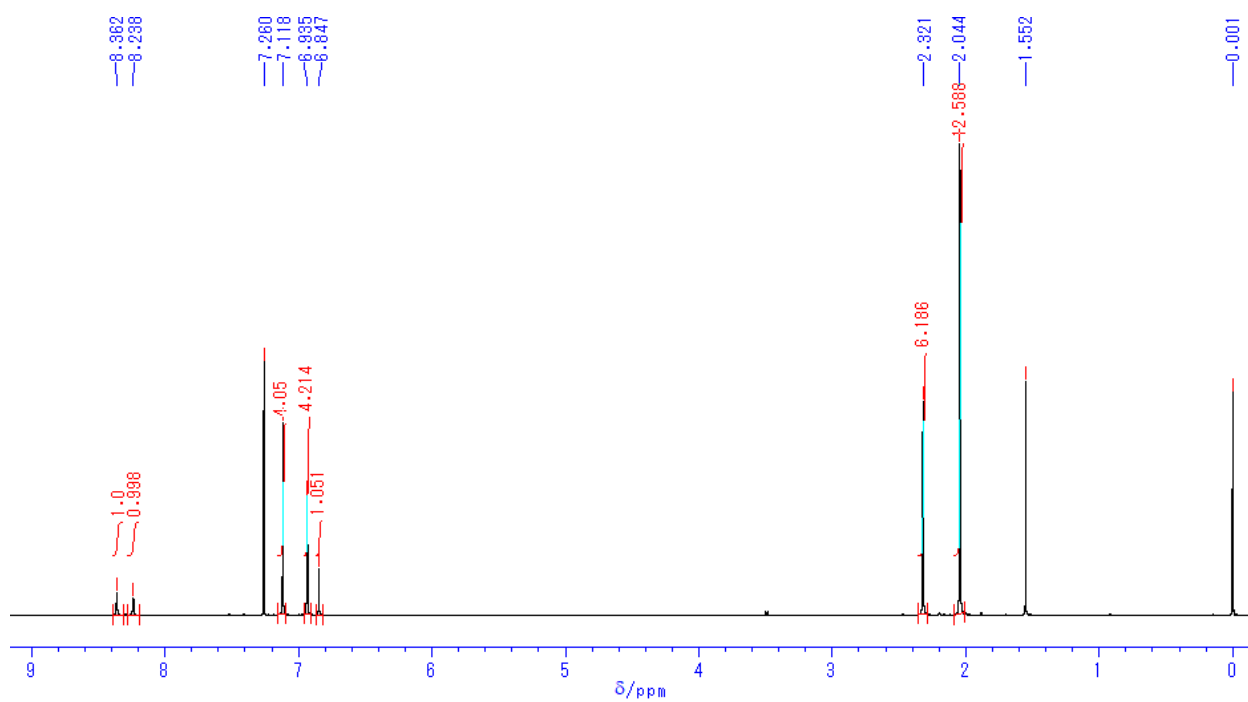

$^{13}\text{C}$  NMR (100 MHz,  $\text{CDCl}_3$ ) spectrum of  $\alpha\text{H-Mes}_2\text{F}_2\text{PyBTM}$

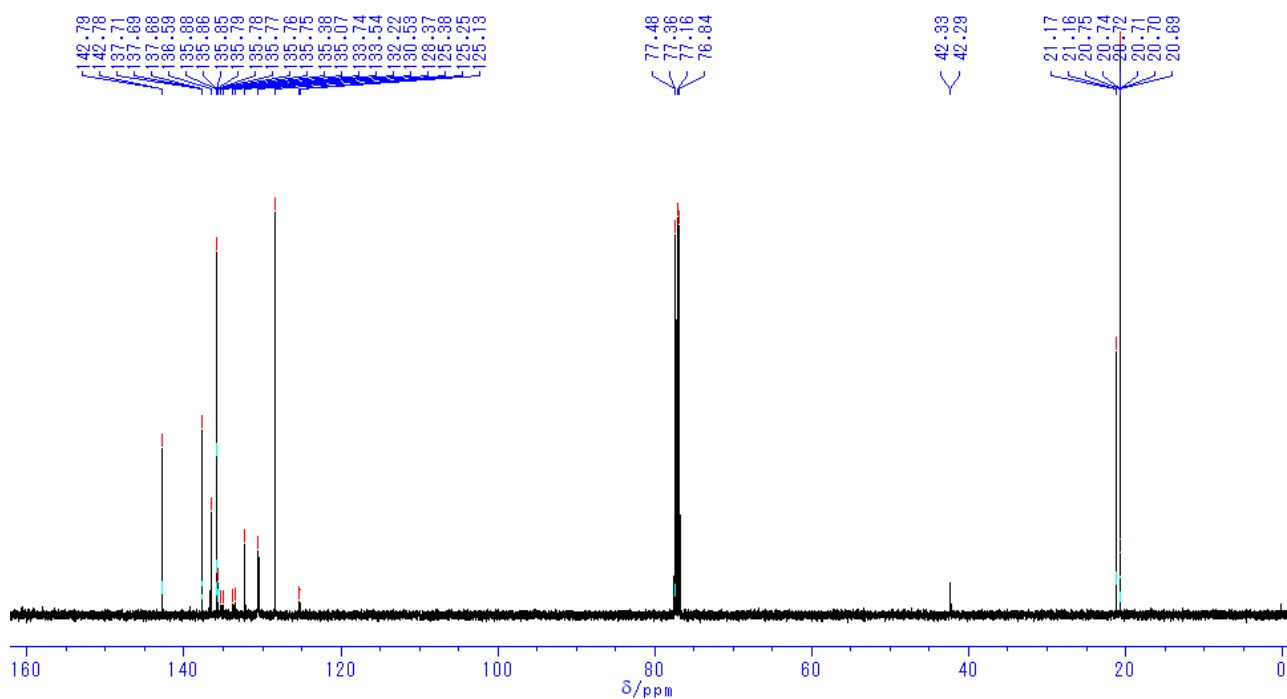

# HRMS of $\alpha$ H-MesPyBTM

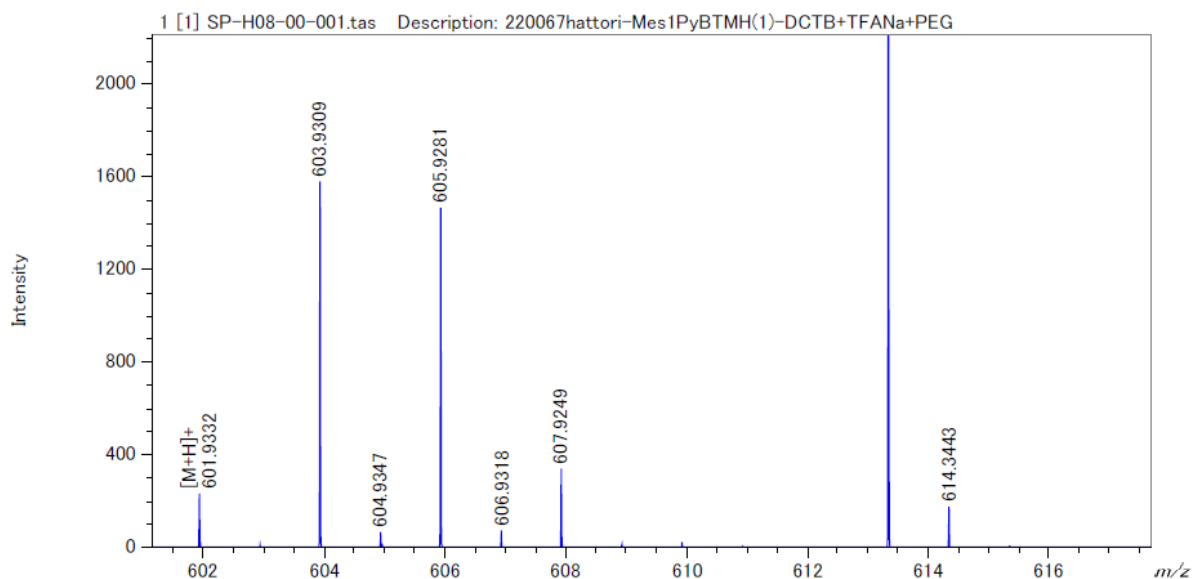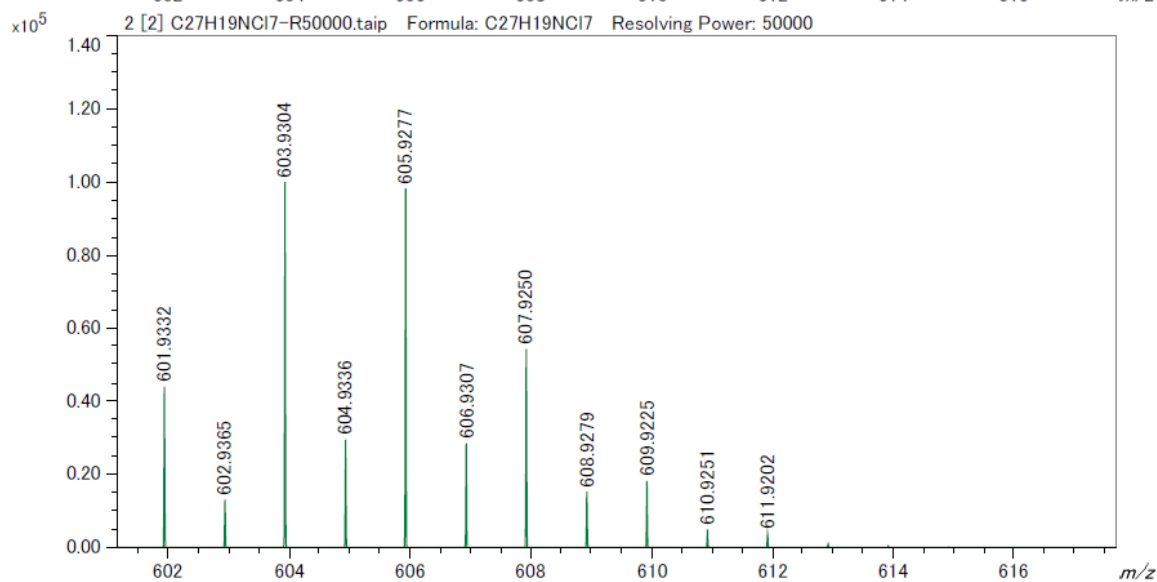

## Elemental Composition Estimation

### Parameters:

Mass 601.93316  $\pm$  0.00301 Tolerance 5.0 ppm Electron Mode Odd/Even Charge +1 DBE Range -0.5 - 200.0 Max Results 100

### Elements

C 20 - 100 H 10 - 200 N 0 - 10 O 0 - 10 Cl 0 - 10

### Results:

| #  | Formula           | Mass      | DBE  | Abs. Error (u) | Error (u) | Error (ppm) |
|----|-------------------|-----------|------|----------------|-----------|-------------|
| 1  | C27 H19 N Cl7     | 601.93317 | 15.5 | 0.00001        | -0.00001  | -0.02       |
| 2  | C24 H14 O10 Cl4   | 601.93356 | 16.0 | 0.00040        | -0.00040  | -0.66       |
| 3  | C30 H16 O Cl6     | 601.93268 | 20.0 | 0.00048        | 0.00048   | 0.79        |
| 4  | C20 H11 N8 O4 Cl5 | 601.93404 | 17.0 | 0.00088        | -0.00088  | -1.46       |
| 5  | C21 H17 N O9 Cl5  | 601.93405 | 11.5 | 0.00089        | -0.00089  | -1.47       |
| 6  | C22 H12 N3 O9 Cl4 | 601.93222 | 16.5 | 0.00094        | 0.00094   | 1.57        |
| 7  | C25 H10 N4 O6 Cl4 | 601.93490 | 21.0 | 0.00174        | -0.00174  | -2.88       |
| 8  | C28 H14 N3 Cl6    | 601.93134 | 20.5 | 0.00182        | 0.00182   | 3.02        |
| 9  | C21 H24 N O2 Cl8  | 601.93098 | 6.5  | 0.00218        | 0.00218   | 3.63        |
| 10 | C22 H13 N5 O5 Cl5 | 601.93538 | 16.5 | 0.00222        | -0.00222  | -3.69       |
| 11 | C20 H10 N6 O8 Cl4 | 601.93087 | 17.0 | 0.00229        | 0.00229   | 3.80        |
| 12 | C31 H11 N2 O Cl5  | 601.93085 | 25.0 | 0.00231        | 0.00231   | 3.83        |
| 13 | C24 H21 O3 Cl7    | 601.93049 | 11.0 | 0.00267        | 0.00267   | 4.44        |



# HRMS of $\alpha$ H-Mes<sub>2</sub>PyBTM

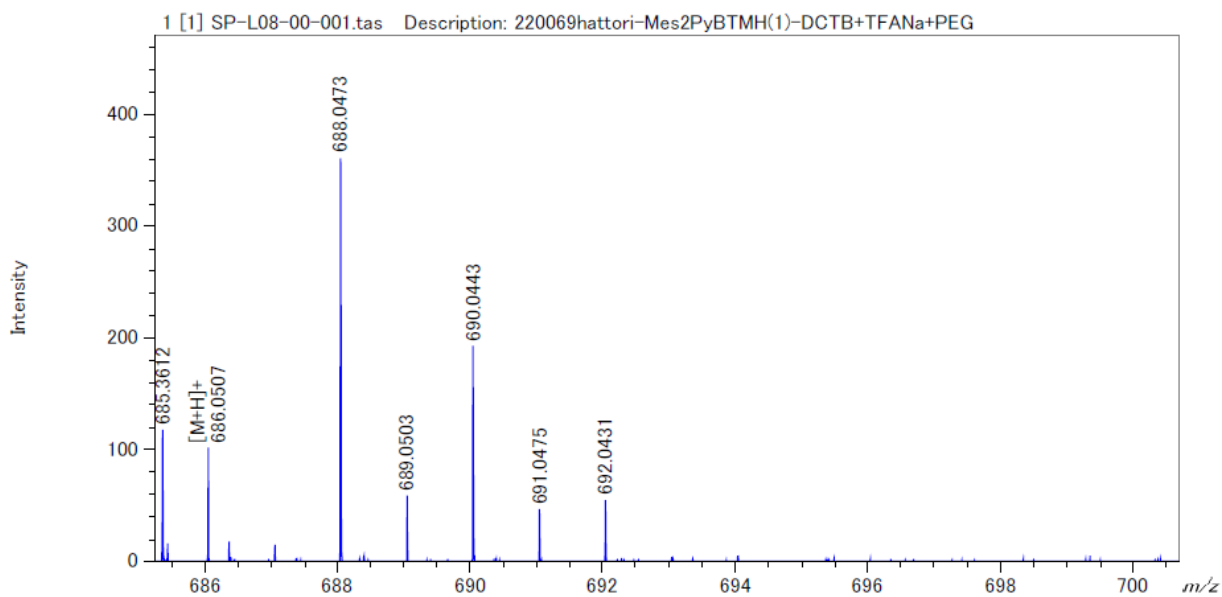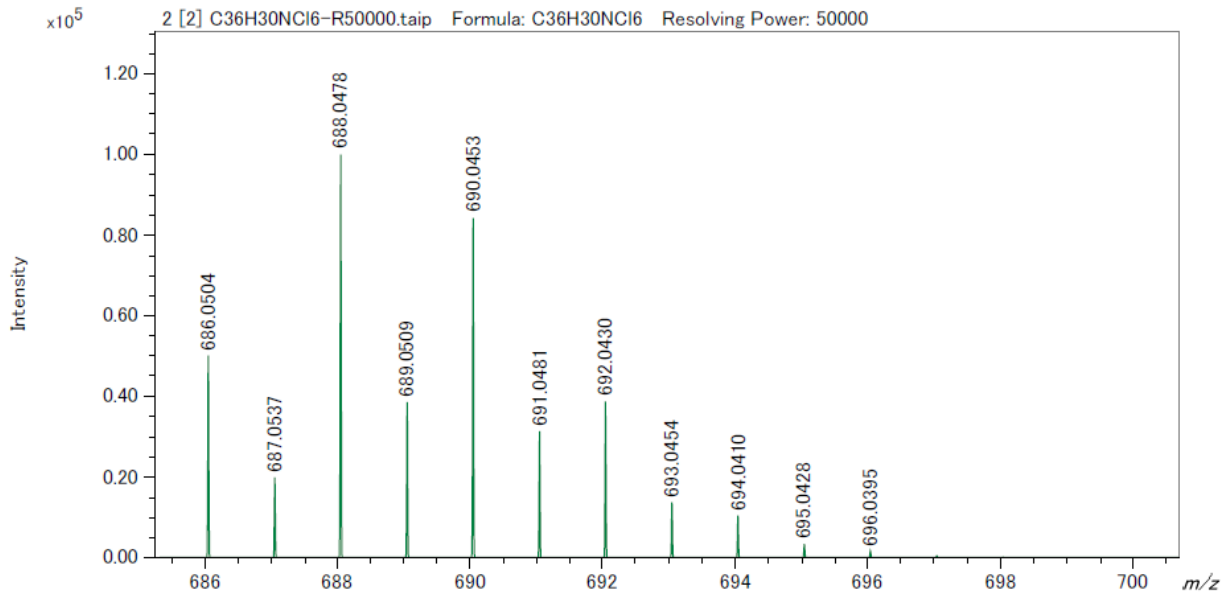

## Elemental Composition Estimation

### Parameters:

Mass 686.05075  $\pm$  0.00343 Tolerance 5.0 ppm Electron Mode Odd/Even Charge +1 DBE Range -0.5 - 200.0 Max Results 100

### Elements

C 20 - 100 H 10 - 200 N 0 - 10 O 0 - 10 Cl 0 - 10

### Results:

| #  | Formula           | Mass      | DBE  | Abs. Error (u) | Error (u) | Error (ppm) |
|----|-------------------|-----------|------|----------------|-----------|-------------|
| 1  | C32 H19 N7 O5 Cl3 | 686.05078 | 25.5 | 0.00003        | -0.00003  | -0.04       |
| 2  | C33 H25 O10 Cl3   | 686.05078 | 20.0 | 0.00003        | -0.00003  | -0.05       |
| 3  | C43 H12 N O9      | 686.05066 | 38.5 | 0.00009        | 0.00009   | 0.13        |
| 4  | C22 H32 N6 O6 Cl6 | 686.05090 | 7.0  | 0.00015        | -0.00015  | -0.22       |
| 5  | C26 H43 O Cl9     | 686.05052 | 1.0  | 0.00023        | 0.00023   | 0.34        |
| 6  | C25 H29 N5 O7 Cl5 | 686.05041 | 11.5 | 0.00033        | 0.00033   | 0.49        |
| 7  | C36 H30 N Cl6     | 686.05039 | 19.5 | 0.00035        | 0.00035   | 0.52        |
| 8  | C40 H15 N2 O8 Cl  | 686.05114 | 34.0 | 0.00040        | -0.00040  | -0.58       |
| 9  | C35 H16 N6 O6 Cl2 | 686.05029 | 30.0 | 0.00046        | 0.00046   | 0.67        |
| 10 | C29 H22 N8 O4 Cl4 | 686.05126 | 21.0 | 0.00052        | -0.00052  | -0.75       |
| 11 | C30 H28 N O9 Cl4  | 686.05127 | 15.5 | 0.00052        | -0.00052  | -0.76       |
| 12 | C28 H26 N4 O8 Cl4 | 686.04993 | 16.0 | 0.00082        | 0.00082   | 1.20        |
| 13 | C39 H27 O Cl5     | 686.04991 | 24.0 | 0.00084        | 0.00084   | 1.23        |

# HRMS of $\alpha$ MesPyBTM

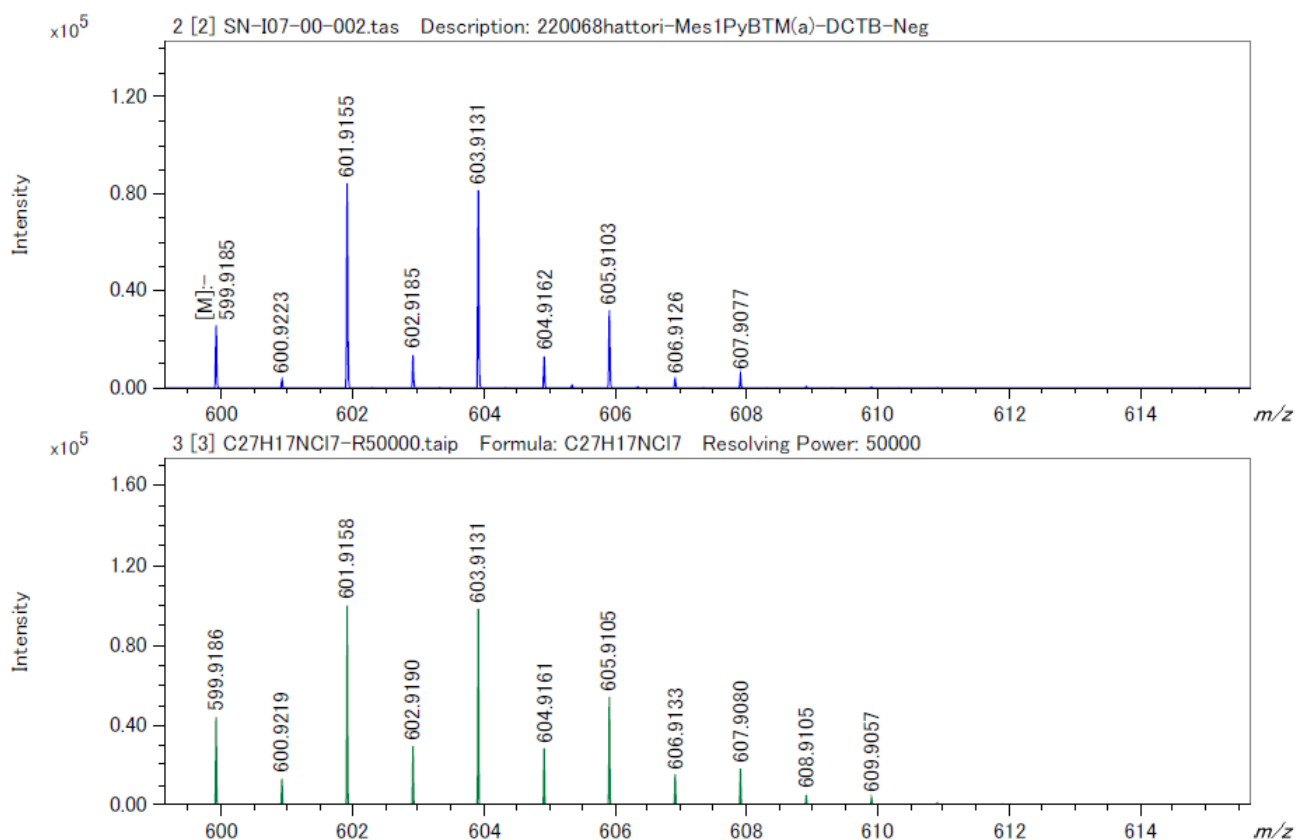

## Elemental Composition Estimation

### Parameters:

Mass: 599.91850 ± 0.00300  
 Tolerance: 5.0 ppm  
 Electron Mode: Odd/Even  
 Charge: 1  
 DBE Range: -0.5 - 200.0  
 Max Results: 100

### Elements

C: 20 - 100, H: 10 - 200, N: 0 - 10, O: 0 - 10, Cl: 0 - 10

### Results:

| # | Formula           | Mass      | DBE  | Abs. Error (u) | Error (u) | Error (ppm) |
|---|-------------------|-----------|------|----------------|-----------|-------------|
| 1 | C27 H17 N Cl7     | 599.91862 | 16.5 | 0.00012        | -0.00012  | -0.20       |
| 2 | C30 H14 O Cl6     | 599.91813 | 21.0 | 0.00037        | 0.00037   | 0.62        |
| 3 | C24 H12 O10 Cl4   | 599.91901 | 17.0 | 0.00051        | -0.00051  | -0.84       |
| 4 | C22 H10 N3 O9 Cl4 | 599.91766 | 17.5 | 0.00084        | 0.00084   | 1.39        |
| 5 | C21 H15 N O9 Cl5  | 599.91949 | 12.5 | 0.00099        | -0.00099  | -1.66       |
| 6 | C28 H12 N3 Cl6    | 599.91679 | 21.5 | 0.00171        | 0.00171   | 2.85        |
| 7 | C21 H22 N O2 Cl8  | 599.91642 | 7.5  | 0.00208        | 0.00208   | 3.46        |
| 8 | C22 H11 N5 O5 Cl5 | 599.92083 | 17.5 | 0.00233        | -0.00233  | -3.89       |
| 9 | C24 H19 O3 Cl7    | 599.91594 | 12.0 | 0.00256        | 0.00256   | 4.27        |

# HRMS of Mes<sub>2</sub>PyBTM

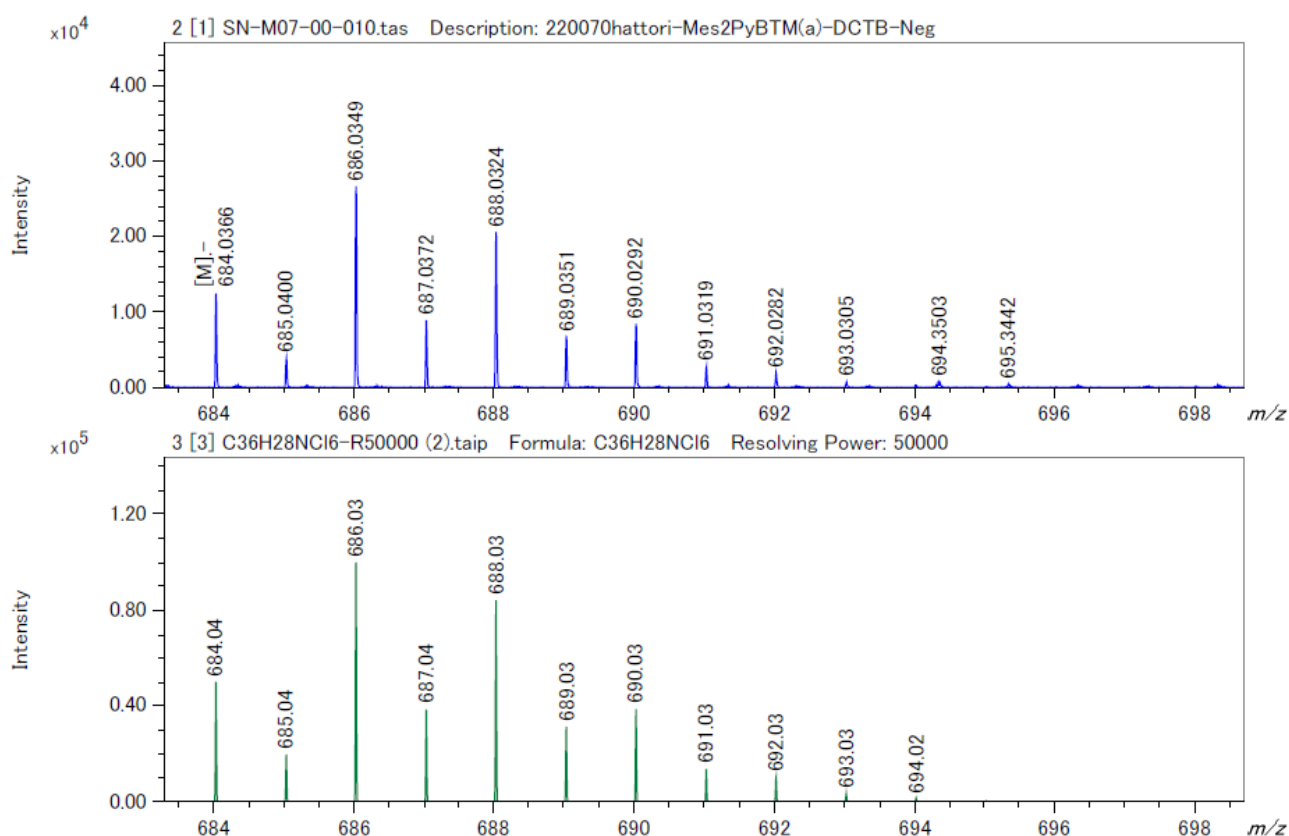

## Elemental Composition Estimation

### Parameters:

Mass 684.03660 ± 0.00342 Tolerance 5.0 ppm Electron Mode Odd/Even Charge 1 DBE Range -0.5 - 200.0 Max Results 100

### Elements

C 30 - 100 H 0 - 100 N 0 - 5 O 0 - 3 Na 0 - 0 Cl 0 - 8

### Results:

| # | Formula          | Mass      | DBE  | Abs. Error (u) | Error (u) | Error (ppm) |
|---|------------------|-----------|------|----------------|-----------|-------------|
| 1 | C36 H28 N Cl6    | 684.03584 | 20.5 | 0.00076        | 0.00076   | 1.11        |
| 2 | C39 H25 O Cl5    | 684.03535 | 25.0 | 0.00125        | 0.00125   | 1.82        |
| 3 | C49 H12 N Cl2    | 684.03523 | 43.5 | 0.00137        | 0.00137   | 2.00        |
| 4 | C52 H9 O Cl      | 684.03474 | 48.0 | 0.00186        | 0.00186   | 2.72        |
| 5 | C37 H23 N3 Cl5   | 684.03401 | 25.5 | 0.00259        | 0.00259   | 3.78        |
| 6 | C30 H33 N O2 Cl7 | 684.03365 | 11.5 | 0.00295        | 0.00295   | 4.32        |
| 7 | C40 H20 N2 O Cl4 | 684.03352 | 30.0 | 0.00308        | 0.00308   | 4.50        |
| 8 | C50 H7 N3 Cl     | 684.03340 | 48.5 | 0.00320        | 0.00320   | 4.68        |

# HRMS of $\alpha$ H-Mes<sub>2</sub>F<sub>2</sub>PyBTM

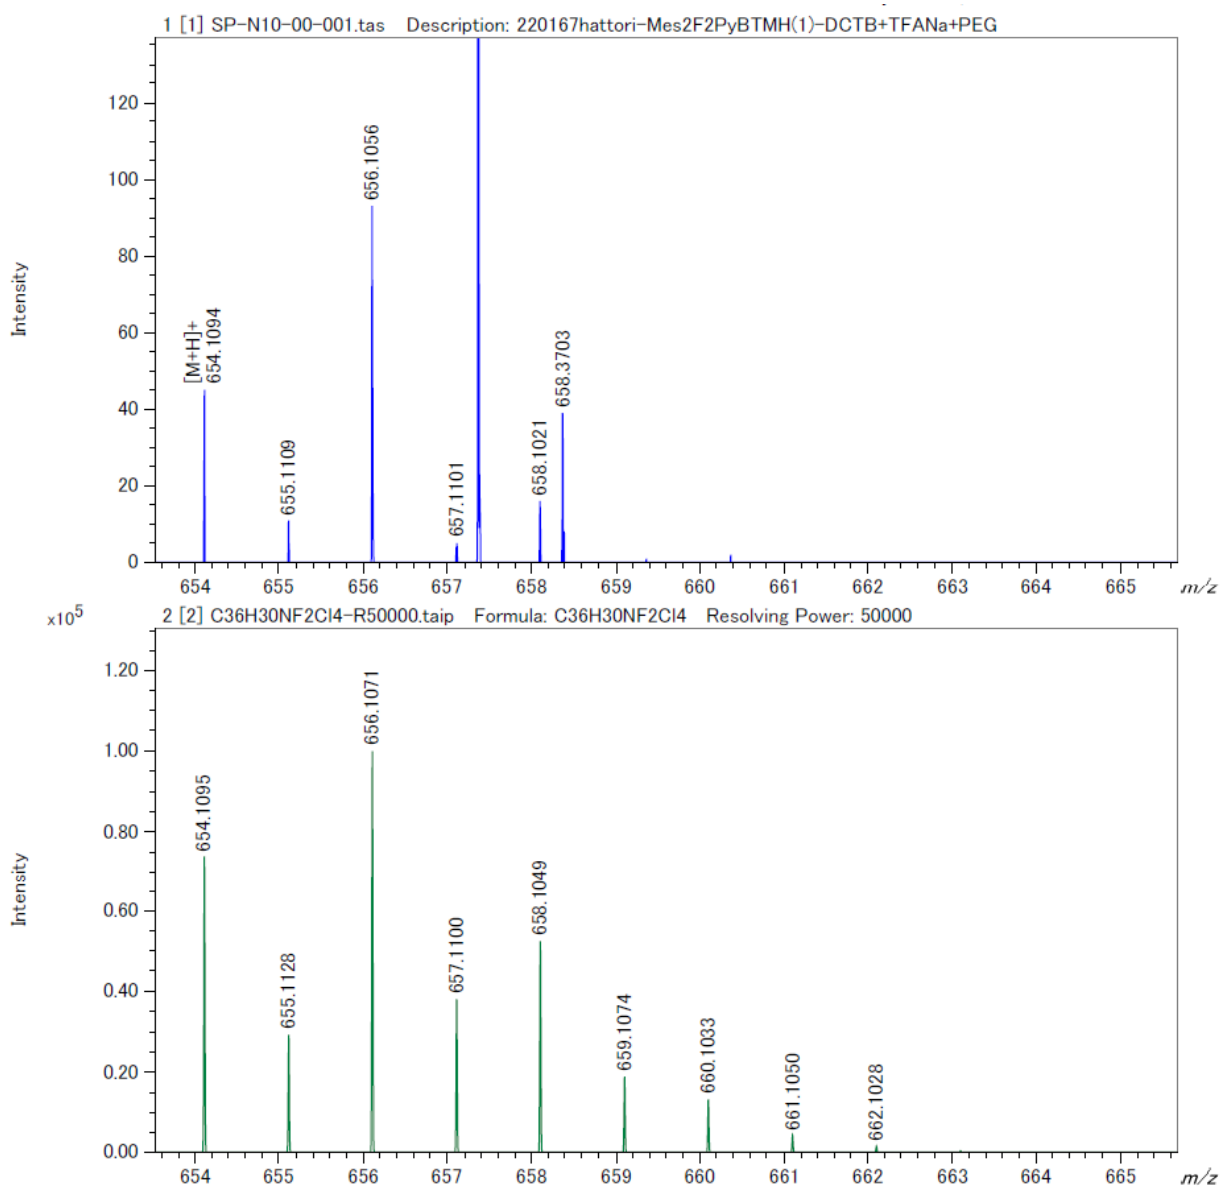

## Elemental Composition Estimation

### Parameters:

| Mass                | Tolerance | Electron Mode | Charge | DBE Range    | Max Results |
|---------------------|-----------|---------------|--------|--------------|-------------|
| 654.10945 ± 0.00327 | 5.0 ppm   | Odd/Even      | +1     | -0.5 - 200.0 | 100         |

### Elements

| C       | H       | N      | Cl     | F     |
|---------|---------|--------|--------|-------|
| 0 - 100 | 0 - 200 | 0 - 10 | 0 - 10 | 0 - 3 |

### Results:

| #  | Formula           | Mass      | DBE  | Abs. Error (u) | Error (u) | Error (ppm) |
|----|-------------------|-----------|------|----------------|-----------|-------------|
| 1  | C36 H30 N F2 Cl4  | 654.10949 | 19.5 | 0.00004        | -0.00004  | -0.07       |
| 2  | C31 H29 N4 F3 Cl4 | 654.10929 | 16.0 | 0.00016        | 0.00016   | 0.24        |
| 3  | C29 H26 N10 Cl4   | 654.10905 | 20.0 | 0.00040        | 0.00040   | 0.61        |
| 4  | C49 H14 N F2      | 654.10888 | 42.5 | 0.00057        | 0.00057   | 0.87        |
| 5  | C44 H13 N4 F3     | 654.10868 | 39.0 | 0.00077        | 0.00077   | 1.17        |
| 6  | C41 H15 N8 Cl     | 654.11027 | 38.0 | 0.00082        | -0.00082  | -1.26       |
| 7  | C29 H42 F Cl7     | 654.10847 | 5.0  | 0.00098        | 0.00098   | 1.49        |
| 8  | C42 H10 N10       | 654.10844 | 43.0 | 0.00101        | 0.00101   | 1.54        |
| 9  | C43 H18 N2 F3 Cl  | 654.11051 | 34.0 | 0.00106        | -0.00106  | -1.62       |
| 10 | C24 H41 N3 F2 Cl7 | 654.10828 | 1.5  | 0.00117        | 0.00117   | 1.80        |
| 11 | C28 H31 N8 Cl5    | 654.11088 | 15.0 | 0.00143        | -0.00143  | -2.19       |
| 12 | C42 H26 F Cl3     | 654.10786 | 28.0 | 0.00159        | 0.00159   | 2.43        |
| 13 | C30 H34 N2 F3 Cl5 | 654.11112 | 11.0 | 0.00167        | -0.00167  | -2.56       |

# HRMS of Mes<sub>2</sub>F<sub>2</sub>PyBTM

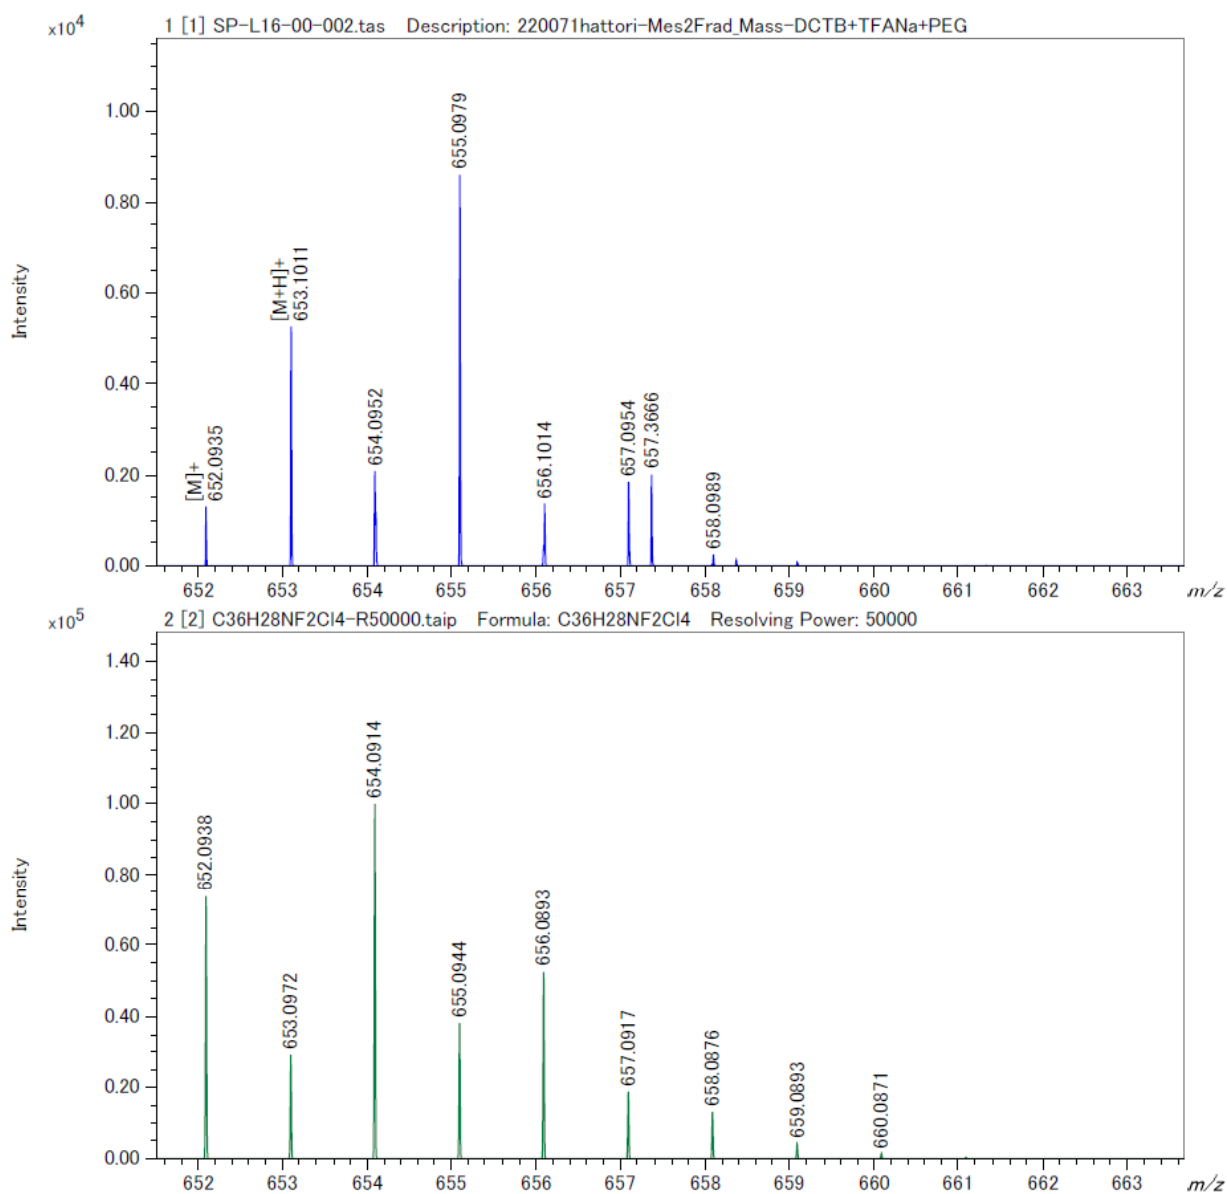

## Elemental Composition Estimation

### Parameters:

Mass 652.09347 ± 0.00326    Tolerance 5.0 ppm    Electron Mode Odd/Even    Charge +1    DBE Range -0.5 - 200.0    Max Results 100

### Elements

C 0 - 100    H 0 - 200    N 0 - 10    F 0 - 10    Cl 0 - 10

### Results:

| #  | Formula            | Mass      | DBE  | Abs. Error (u) | Error (u) | Error (ppm) |
|----|--------------------|-----------|------|----------------|-----------|-------------|
| 1  | C23 H28 N4 F8 Cl4  | 652.09348 | 6.0  | 0.00001        | -0.00001  | -0.02       |
| 2  | C26 H26 N7 F4 Cl4  | 652.09344 | 13.5 | 0.00003        | 0.00003   | 0.05        |
| 3  | C29 H24 N10 Cl4    | 652.09340 | 21.0 | 0.00007        | 0.00007   | 0.11        |
| 4  | C31 H27 N4 F3 Cl4  | 652.09364 | 17.0 | 0.00017        | -0.00017  | -0.26       |
| 5  | C18 H27 N7 F9 Cl4  | 652.09328 | 2.5  | 0.00019        | 0.00019   | 0.29        |
| 6  | C28 H29 N F7 Cl4   | 652.09368 | 9.5  | 0.00021        | -0.00021  | -0.32       |
| 7  | C21 H25 N10 F5 Cl4 | 652.09324 | 10.0 | 0.00023        | 0.00023   | 0.35        |
| 8  | C49 H12 N F2       | 652.09323 | 43.5 | 0.00024        | 0.00024   | 0.37        |
| 9  | C36 H28 N F2 Cl4   | 652.09384 | 20.5 | 0.00037        | -0.00037  | -0.57       |
| 10 | C41 H13 N F7       | 652.09307 | 32.5 | 0.00040        | 0.00040   | 0.61        |
| 11 | C44 H11 N4 F3      | 652.09303 | 40.0 | 0.00044        | 0.00044   | 0.68        |
| 12 | C36 H12 N4 F8      | 652.09287 | 29.0 | 0.00060        | 0.00060   | 0.92        |
| 13 | C39 H10 N7 F4      | 652.09283 | 36.5 | 0.00064        | 0.00064   | 0.98        |
